# **Characterization of *P. falciparum* dipeptidyl aminopeptidase 3 specificity reveals structural factors responsible for differences in amino acid preferences between peptide-based substrates and covalent inhibitors.**

Laura E. de Vries<sup>1,§</sup>, Mateo I. Sanchez<sup>2,§</sup>, Katarzyna Groborz<sup>3,§</sup>, Laurie Kuppens<sup>4,§</sup>, Marcin Poreba<sup>3</sup>, Christine Lehmann<sup>4</sup>, Fang Yuan<sup>5</sup>, Shirin Arastu-Kapur<sup>5</sup>, Martin Horn<sup>6</sup>, Michael Mares<sup>6</sup>, Matthew Bogyo<sup>5</sup>, Marcin Drag<sup>3</sup>, and Edgar Deu<sup>4,§,\*</sup>.

<sup>1</sup>Department of Medical Microbiology, Radboud University Medical Center, Nijmegen, Netherlands.

<sup>2</sup>Department of Genetics, Stanford School of Medicine, Stanford, California, United States.

<sup>3</sup>Division of Bioorganic Chemistry, Faculty of Chemistry, Wrocław University of Technology, Wrocław, Poland.

<sup>4</sup>Chemical Biology Approaches to Malaria Laboratory, The Francis Crick Institute, London, England, United Kingdom.

<sup>5</sup>Department of Pathology, Stanford University School of Medicine, Stanford, United States.

<sup>6</sup>Institute of Organic Chemistry and Biochemistry, Czech Academy of Sciences, Prague, Czech Republic.

§ These authors contributed equally to this work.

\*Corresponding author:

e-mail: [edgar.deu@crick.ac.uk](mailto:edgar.deu@crick.ac.uk)

Tel: +44 (0) 20 3796 1412

## Abstract

Malarial dipeptidyl aminopeptidases (DPAPs) are cysteine proteases important for parasite development thus making them attractive drug targets. In order to develop inhibitors specific to the parasite enzymes it is necessary to map the determinants of substrate specificity of the parasite enzymes and its mammalian homologue cathepsin C (CatC). Here, we screened peptide-based libraries of substrates and covalent inhibitors to characterize the differences in specificity between parasite DPAPs and CatC, and used this information to develop highly selective DPAP1 and DPAP3 inhibitors. Interestingly, while the primary amino acid specificity of a protease is often used to develop potent inhibitors, we show that equally potent and highly specific inhibitors can be developed based on the sequences of non-optimal peptide substrates. Importantly, analysis of previously published data about the specificity of other proteases also unveiled significant discrepancies in the amino acid preference between substrates and inhibitors. In this article, we also discuss important structural and theoretical reasons that might account for these discrepancies. Overall, this study illustrates that focusing the development of protease inhibitors solely on substrate specificity might overlook important structural features that can be exploited to develop highly potent and selective compounds.

## Introduction

Malaria is a devastating infectious parasitic disease causing nearly half a million deaths every year[1]. Malaria is caused by parasites of the *Plasmodium* genus and is transmitted by *Anopheles* mosquitoes during a blood meal. Within the mosquito midgut, parasites reproduce sexually, multiply, and travel to the salivary glands from where they are transmitted to the human host. Upon infection, the parasites first establish an asymptomatic infection in the liver, followed by an exponential asexual replication in the blood stream, through multiple rounds of red blood cell (RBC) invasion, intracellular replication and egress from infected RBCs, this erythrocytic cycle is responsible for the symptoms and pathology of this disease. Over the last 15 years the world has seen a very significant drop in malaria incidence, mainly due to the global distribution of insecticide-impregnated bed nets and the use of artemisinin-based combination therapies as the standard of care for uncomplicated malaria[2]. However, malaria remains a major global health burden with half of the world population at risk and around 200 million clinical cases per year. Unfortunately, mosquitoes are becoming increasingly resistant to insecticides[3] and artemisinin resistance is on the rise[4], thus making the identification of antimalarial targets and the development of drugs with novel mechanism of action extremely urgent[5].

Dipeptidyl aminopeptidases (DPAPs) are papain-fold cysteine proteases that are expressed at all stages of parasite development[6,7] and might therefore be viable drug targets to treat malaria and prevent its transmission. DPAPs recognize the free N-terminus of protein substrates and cleave N-terminal dipeptides[8,9]. The mammalian homologue cathepsin C (CatC) is the best studied DPAP[10]. In most cells, CatC plays a catabolic lysosomal function. However, in immune cells it is responsible for activating various granule serine proteases involved in the immune response and inflammation such as neutrophil elastase, chymase, granzyme A and B, or cathepsin G[11-14]. Because of its role in activating pro-inflammatory

proteases, CatC has been pursued as a potential target for chronic inflammatory diseases[15-17], and phase I clinical trials with CatC inhibitors have been performed by GSK (GSK2793660)[18] and Astrazeneca (AZD7986)[19], thus proving that DPAPs can be targeted with small drug-like molecules.

Three DPAPs are conserved across *Plasmodium* species but very little is known about their molecular functions. In *P. falciparum*, the most virulent *Plasmodium* specie responsible for 90% of malaria mortality, attempts to directly knockout (KO) DPAP1[20] or DPAP3[21] have been unsuccessful, suggesting that they are important for parasite replication. Also, in the *P. berghei* murine model of malaria, KO of DPAP1 or DPAP3 results in a significant decrease in parasite replication[22-24]. DPAP1 localizes mainly in the digestive vacuole[20], an acidic organelle where degradation of haemoglobin takes place. This proteolytic pathway provides a source of amino acids for protein synthesis and liberates space within the RBC for parasites to grow. DPAP1 has been proposed to play an essential role at the bottom of this catabolic pathway[20][25], however, this function has not yet been confirmed genetically. Previously published inhibition studies suggested that DPAP3 was at the top of the proteolytic cascade that controls parasite egress from iRBCs[26]. However, our recent conditional KO studies have disproven this hypothesis and shown that DPAP3 is instead critical for efficient RBC invasion[21]. Finally, DPAP2 is only expressed in sexual stages and has been shown to be important for gamete egress from iRBCs, thus making it a potential target to block malaria transmission[27][28]. Overall, a pan-DPAP inhibitor will target the parasite at different stages of development, thus potentially slowing down the emergence of resistance.

A clear understanding of the determinants of substrate specificity of *Plasmodium* DPAPs and CatC will be required in order to develop pan-DPAP inhibitors with minimal off target effects on host CatC, and to design highly specific inhibitors to study the biological function of DPAP1 and DPAP3. A general approach to determine the specificity of proteases

upstream of the scissile bond (non-prime pockets) is the use of positional scanning substrate libraries where a fluorophore is conjugated to the C-terminus of a peptide library *via* an amide bond. Proteolytic cleavage of this bond results in a significant increase in fluorescence intensity allowing accurate measurement of substrate turnover. The most common libraries used for this purpose are positional scanning synthetic combinatorial libraries (PS-SCL)[29-31]. PS-SCL are composed of multiple sub-libraries designed to determine the specificity of each non-prime binding pocket in a protease. In each sub-library, the amino acid (AA) at a specific position is varied while a stoichiometric mixture of all natural AAs is used in all other positions. PS-SCL thus provide the substrate specificity at each site in the context of all possible combination of AAs at all other positions. Alternatively, the specificity of a given binding pocket can be determined by varying the identity of the AA at that position while fixing the rest of the peptide to residues known to be recognized by the protease of interest. This approach has been used to fingerprint the specificity of amino exopeptidases such as aminopeptidases[32,33] or DPAPs[34], which only recognize one or two AAs upstream of the scissile bond, respectively. PS-SCL have also been applied to protease inhibitor libraries by replacing the fluorophore with a reversible or irreversible warhead[35]. Optimum substrates and inhibitors are then designed by combining the best residues in each position. Importantly, the recent incorporation of non-natural AAs into these libraries has significantly increased the chemical space that can be explored to characterize the specificity of proteases and has allowed the design of substrates and inhibitors with enhanced selectivity over compounds that contain only natural amino acids[36-38].

Structure-activity relationship (SAR) studies with positional scanning substrate and inhibitor libraries have been performed both on DPAP1 and CatC[25,39,40], but to a much lesser extent on DPAP3[26]. Here, we used libraries of peptide-based substrates and inhibitors to determine the specificity of *P. falciparum* DPAP3 at the P1 and P2 positions. Importantly,

the libraries used in this study have been previously screened against DPAP1 and CatC and are therefore ideal to compare the specificities of these three proteases[34]. Our studies show that DPAP3 preferentially cleaves after basic and large aromatic residues (P1 position) and that it prefers substrates having N-terminal aliphatic residues (P2 position). We also identified several non-natural P2 residues that are exclusively recognized by either DPAP1 or DPAP3. By combining the SAR information obtained from these substrate and inhibitor screens we developed specific DPAP1 and DPAP3 inhibitors that remain selective in live parasites. Interestingly, while SAR information obtained from positional scanning substrate libraries is often used to develop potent protease inhibitors[38], we have identified significant differences in specificity between substrates and inhibitors, particularly in the case of DPAP3 and to a lesser extent for CatC and DPAP1. Surprisingly, we also observed significant discrepancies when we compared previously published specificity data about cysteine cathepsins and caspases obtained from PS-SCLs of substrates and inhibitors.

Overall, our study shows that while highly potent inhibitors can be designed based on the sequence of optimal substrates, equally potent and specific inhibitors can be developed using sequences of non-optimal substrates. This work also illustrates how important the choice of warhead is to translate specificity information obtained from positional scanning substrate libraries into potent covalent inhibitors.

## Results

**DPAP3 Substrate Specificity.** A positional scanning library of 96 substrates (Fig. 1A), composed of a P1 sub-library of 39 substrates (P2 fixed to Met) and a P2 sub-library of 57 substrates (P1 fixed to homophenylalanine (hPhe)), was screened at 1  $\mu$ M against recombinant DPAP3 (DPAP3; Fig. 1B-C). The heat map shown in Fig. 1B compares the specificities of DPAP3 with those previously obtained for DPAP1 and CatC[34] at the same substrate

concentration. Note that *D*-Phg is the only *D*-AA in P2 that is cleaved by DPAP3, albeit poorly. The remaining 17 substrates containing *D*-AAs in P2 (*D*-hPhe and all natural *D*-AAs except *D*-Cys and *D*-Met) were not cleaved by DPAP3, nor by DPAP1 or CatC. To simplify the Fig., *D*-Phg is the only substrate containing a *D*-AA that is shown in Fig. 1.

All three DPAPs show broad and similar P1 specificity, which is not surprising because in clan CA proteases the P1 residue side chain is solvent exposed. For all DPAPs, a general preference for long basic, aliphatic, and aromatic P1 residues was observed—basic: Lys, Arg, homoarginine (hArg), and nitroarginine (Arg(NO<sub>2</sub>)); aliphatic: Met, norvaline (nVal) and Leu; aromatic: hPhe, (4-benzothiazol-2-yl)homoalanine (hAla (Bht)), 6-benzyloxynorleucine (nLeu(o-Bzl)), glutamic acid benzyl ester (Glu(Bzl)), and homoserine-*O*-benzyl (hSer(Bzl))—. Interestingly, DPAP1 differs from CatC and DPAP3 in that it does not accept large hydrophobic groups such as cyclohexylalanine (Cha), 2-naphthalene (2Nal), biphenylalanine (Bip), 4-benzoyl-phenylalanine (Bpa), tyrosine-*O*-benzoyl (Tyr(Bzl)), or 4-guanidino-phenylalanine (Phe(guan)) in P1. Unfortunately, we could not identify any P1 residue that was recognized by DPAP1 and/or DPAP3 but not by CatC.

Clear differences in specificity were observed between the three DPAPs at the P2 position (Fig. 1B). DPAP3 seems to have a narrower P2 specificity for natural AAs than DPAP1 or CatC, probably reflecting its more specific biological function in RBC invasion compared to the catabolic functions of DPAP1 and CatC. Both DPAP1 and DPAP3 have a strong preference for long aliphatic residues such as Leu, Ile, norleucine (nLeu), Met, or norvaline (nVal). Some non-natural AAs seem to be exclusively cleaved by DPAP3 such as cyclohexylglycine (Chg), Phg, or 4-methyl-phenylalanine (Phe(Me)). Surprisingly, Phe(Me) is the only substrate in the library with an aromatic P2 residue that is accepted by DPAP3 even though vinyl sulfone (VS) inhibitors with P2 aromatic residues such as Tyr, Trp, or

nitrotyrosine (Tyr(NO<sub>2</sub>)) have been shown to be potent DPAP3 inhibitors[21,26]. Interestingly, an Ile in P2 is efficiently cleaved by both *Plasmodium* DPAPs but not by CatC.

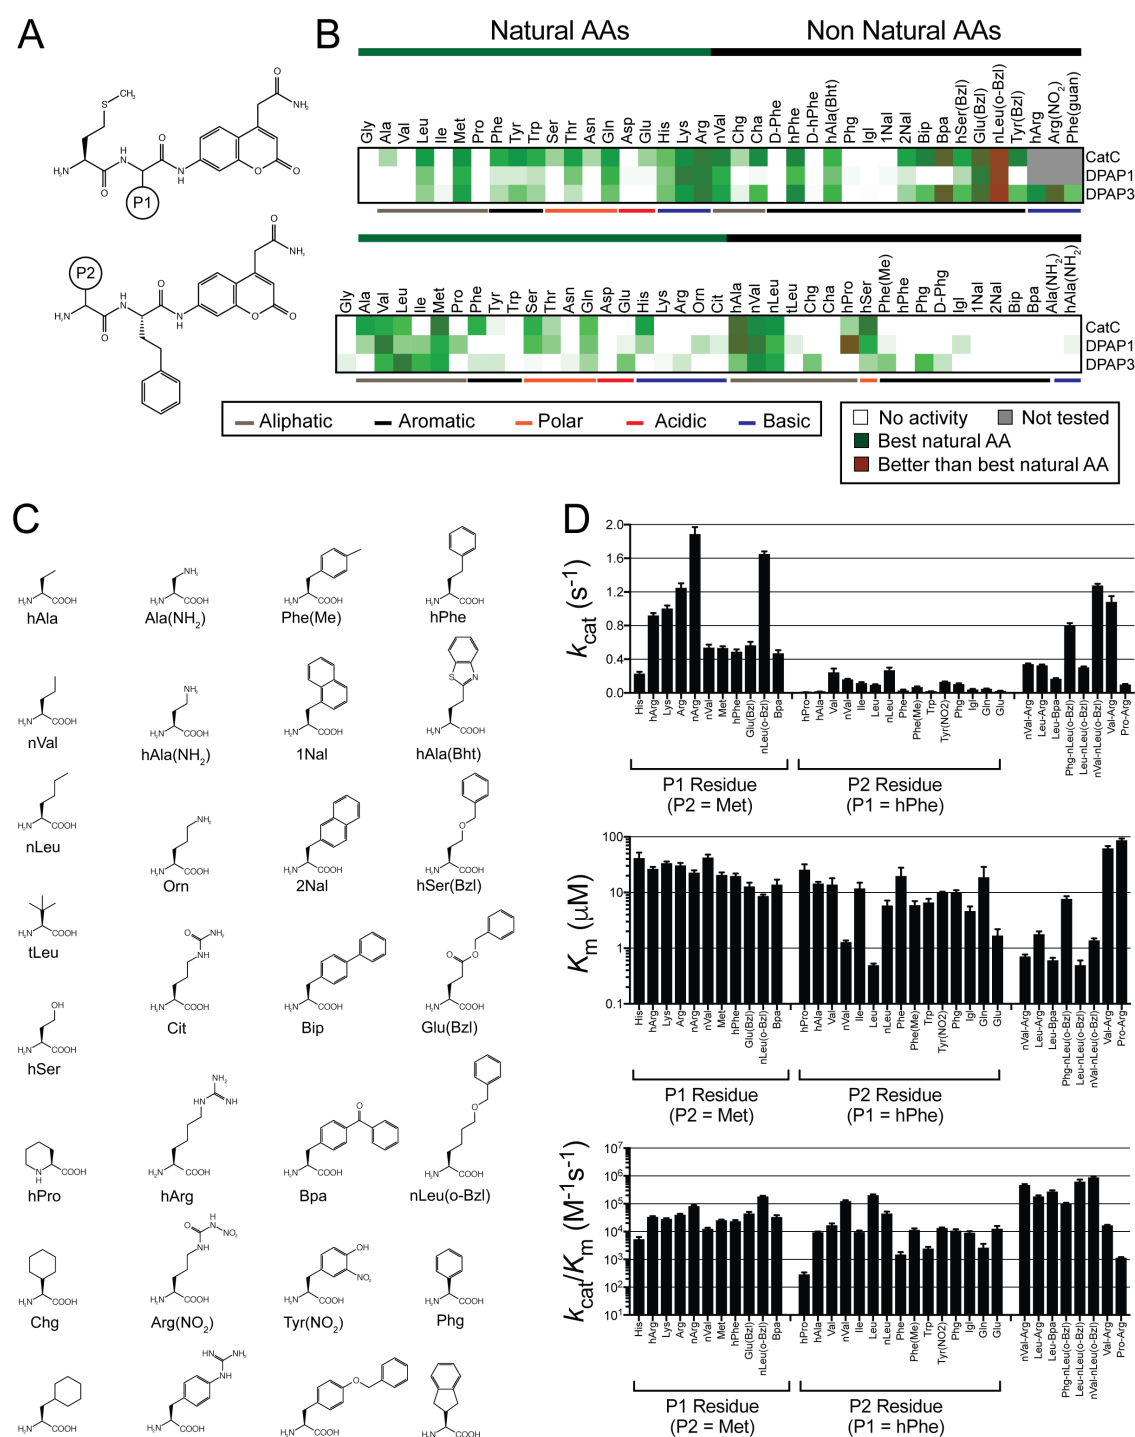

**Fig. 1. DPAP3 substrate specificity.** (A) Structure of P1 and P2 substrate libraries. (B) Heat map comparing relative turnover rates for the different DPAPs at 1  $\mu$ M substrate. For each enzyme and substrate turnover rates were normalized relative to the best natural AA (dark green): Arg in P1 for all DPAPs; Met, Val, and Leu in P2 for CatC, DPAP1, and DPAP3, respectively. Red indicates substrates that are turned over better than the best natural AA. White represent no activity, and grey substrates that were only tested on DPAP3. (C) Structure of non-natural AAs used in the substrate library. (D) Steady-state Michaelis Menten parameters for DPAP3 determined for selected substrates.



**Development of optimum DPAP3 substrates.** To determine how P1 and P2 side chains influence  $k_{\text{cat}}$  and  $K_{\text{m}}$  values for DPAP3, we performed Michaelis Menten studies on selected substrates from the P1 and P2 libraries. In addition, we synthesized a series of substrates that combine optimal natural and non-natural AAs for DPAP3: Arg, hPhe, nLeu(o-Bzl), and Bpa in P1, and Leu, Val, nVal, and Phg in P2. We also tested substrates predicted to be DPAP1-selective (Pro-Arg-ACC and hPro-hPhe-ACC) against DPAP3. Finally, because we were surprised by the lack of activity observed for substrates with aromatic P2 residues, we measured Michaelis Menten parameters for Phe-Arg-ACC, Trp-hPhe-ACC, and Tyr(NO<sub>2</sub>)-hPhe-ACC. The sequence of the last substrate is based on the structure of SAK1 (Tyr(NO<sub>2</sub>)-hPhe-VS), which is the most potent DPAP3 inhibitor identified so far (see below). Table 1 and Fig. 1D report the Michaelis Menten parameters determined for all these substrates (Michaelis Menten curves are shown in Fig. S1).

P1 residues have a significant influence in  $k_{\text{cat}}$ , with nLeu(o-Bzl) and positively charged residues having the highest values. A positive charge on the  $\delta$  position (Arg(NO<sub>2</sub>) and Arg) is favoured over the  $\epsilon$  position (Lys and hArg). Elongated aliphatic and hydrophobic residues in P1 decrease  $K_{\text{m}}$ , especially when aromatic groups are distant from the peptide backbone. This is evident by the decreasing  $K_{\text{m}}$  values between nVal, Met, hPhe, Bpa, Glu(Bzl), and nLeu(o-Bzl). This tendency was also observed for CatC and DPAP1, and might suggest the presence of a distal binding pocket (Fig. 1B), potentially an exosite, since P1 residues are usually solvent exposed in clan CA proteases.

P2 residues have a bigger influence on  $K_{\text{m}}$  than P1, with Leu and nVal being optimal P2 residues for DPAP3. Beta branched residues are not optimal for DPAP3 as can be observed by an increase in  $K_{\text{m}}$  between nVal and Val or nLeu and Ile. However, the  $\gamma$ -branched AA Leu has the lowest  $K_{\text{m}}$ . Substrates with aliphatic P2 side chains that extend to the  $\delta$  position (Met and nLeu) result in higher  $K_{\text{m}}$  values than slightly shorter ones (Leu and nVal) but also higher  $k_{\text{cat}}$

values. Overall, combining optimal P1 (nLeu(o-Bzl) and Arg) and P2 (nVal and Leu) residues results in improved  $k_{\text{cat}}/K_m$  values (Table 1).

Interestingly, although substrates with Phg and indanyl-glycine (Igl) in P2, or Bpa in P1, are not the preferred AAs at these positions, these non-natural residues are structurally very different from natural AAs and are turned over quite efficiently by DPAP3 when combined with optimal P1 or P2 residues, respectively, i.e. Leu-Bpa-ACC or Phg-nLeu(o-Bzl)-ACC. Finally, the optimal substrate for DPAP1, hPro-hPhe-ACC[34], is very poorly turned over by DPAP3 (> 200-fold difference in  $k_{\text{cat}}/K_m$ ). We think that substrates containing these non-natural AAs could be used as specific tools to measure DPAP1 or DPAP3 activity in biological samples, i.e. parasite lysates or live parasites, an application we are currently investigating.

Finally, our studies show that substrates with aromatic P2 residues are poorly cleaved by DPAP3 compared to optimal substrates, i.e. 100 to 1000-fold lower  $k_{\text{cat}}/K_m$ . This is surprising since vinyl sulfone inhibitors containing aromatic P2 residues such as Tyr(NO<sub>2</sub>) or Trp, are potent and selective DPAP3 inhibitors[21,26]. Because these two AA side chains have fluorogenic properties, we investigated whether the low turnover rate measured for Tyr(NO<sub>2</sub>)-hPhe-ACC and Trp-hPhe-ACC might be due to quenching effects. The emission of free ACC (0, 1, or 5 μM) in assay buffer was measured in the presence of 0-100 μM of these substrates (Fig. 2A-B). No significant decrease the ACC emission signal was observed even when substrates were present in 100-fold excess, thus indicating that the low turnover rates measured for these substrates are not due to quenching effects.

As an alternative method to confirm that Tyr(NO<sub>2</sub>)-hPhe-ACC and Trp-hPhe-ACC bind relatively poorly to DPAP3, we performed substrate competition assays using the (PR)<sub>2</sub>Rho substrate ( $\lambda_{\text{ex}} = 492$  nm,  $\lambda_{\text{em}} = 523$  nm), which emits at much higher wavelengths than ACC ( $\lambda_{\text{ex}} = 355$  nm,  $\lambda_{\text{ex}} = 460$  nm), and thus allowing us to simultaneously measure the turnover of (PR)<sub>2</sub>Rho and ACC substrates without quenching interference. (PR)<sub>2</sub>Rho was initially designed

as a DPAP1 specific substrate to directly measure the activity of this protease in crude parasite extracts[41], but it is also cleaved by DPAP3 with a  $K_{m,app}$  of 40  $\mu\text{M}$  (Fig. 3C). This substrate is cleaved twice by DPAPs, releasing two Pro-Arg dipeptides and the rhodamine 110 fluorophore. In this assay, we simultaneously measured inhibition of  $(\text{PR})_2\text{Rho}$  turnover by ACC substrates ( $\text{IC}_{50}$  values) as well as the apparent  $K_m$  values of these ACC substrates in the presence of 40  $\mu\text{M}$   $(\text{PR})_2\text{Rho}$  ( $K_{m,app}$  values). As shown in Fig. 2D, the  $\text{IC}_{50}$  and  $K_{m,app}$  values obtained are within experimental error and, as expected, slightly higher than the  $K_m$  values reported in Table 1 due to the substrate competition effect.

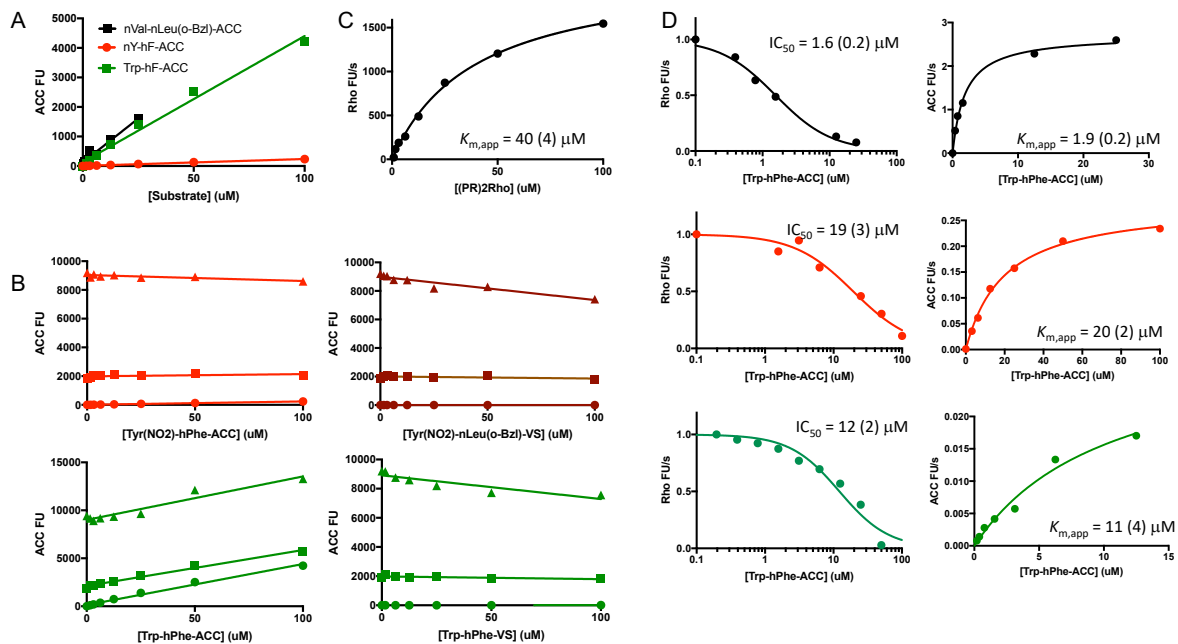

**Fig. 2. Substrate quenching and substrate competition studies.** (A) Background fluorescence signal of selected substrates measured in assay buffer. Note that Tyr(NO<sub>2</sub>)-hPhe-ACC shows a very low level of background fluorescence compared to Trp-hPhe-ACC or nVal-nLeu(o-Bzl)-ACC (Fig. 3A) likely indicating intramolecular quenching between ACC and Tyr(NO<sub>2</sub>). (B) ACC fluorescence signal measured at increasing concentrations of the indicated substrates and inhibitors in the presence at 0 (circles), 1 (squares) or 5 (triangles)  $\mu\text{M}$  of free ACC. (C)  $(\text{PR})_2\text{Rho}$  turnover by rDPAP3. (D) Turnover rates of  $(\text{PR})_2\text{Rho}$  (left graphs) and ACC substrates (right graphs) measured at 40  $\mu\text{M}$  of  $(\text{PR})_2\text{Rho}$  and increasing concentrations of ACC substrates.  $K_{m,app}$  and  $\text{IC}_{50}$  values are indicated in each graph.

Overall, the lack of quenching effect between Trp or Tyr(NO<sub>2</sub>) and ACC, and the good agreement between  $\text{IC}_{50}$  and  $K_{m,app}$  measured under substrate competition conditions indicate that the Michaelis Menten parameters reported in Table 1 are accurate and that substrates

containing aromatic P2 AAs are indeed relatively poor DPAP3 substrates compared to those containing optimal aliphatic P2 residues. These results raise the question of why vinyl sulfone inhibitors with aromatic P2 residues are among the most potent DPAP3 inhibitors identified so far. To better understand this discrepancy, we measured the kinetics of inactivation of DPAP3 by the previously published vinyl sulfone inhibitor library[25,26].

**DPAP3 Inhibitor Specificity.** Time- and concentration-dependent inactivation of DPAP3 by the P2 library of vinyl sulfone inhibitors (P1 fixed to hPhe) was measured using a continuous assay at 2.2  $\mu\text{M}$  of Met-nLeu(o-Bzl)-ACC ( $0.25 \times K_m$ ). For most compounds, the mechanism of inhibition was consistent with a two-step irreversible inhibition model (Eq. 1, Fig. 3A).

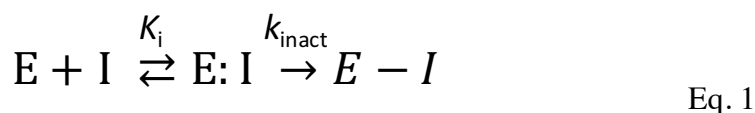

$K_i$  is the inhibition equilibrium constant, and  $k_{\text{inact}}$  the rate of covalent modification of the catalytic Cys.

For a few inhibitors only  $k_{\text{inact}}/K_i$  values could be obtained, i.e. no saturation was achieved in the  $k_{\text{obs}}$  vs.  $[I]$  graph (Fig. 3B). The inhibition constants are reported in Fig. 3C and Table 2, and the curve fits shown in Fig. S2. Only one inhibitor, the one with an amino-methyl-benzyl (Amb) group in P2, was not able to inhibit DPAP3 in a time-dependent manner under our assay conditions (Fig. 3D). This is probably due to the fact that this extended and rigid P2 AA (Fig. 3E) might prevent proper positioning of the vinyl sulfone group into the active site of DPAP3 to allow covalent modification of the catalytic Cys. For this compound, a  $K_i$  value for reversible inhibition was measured.

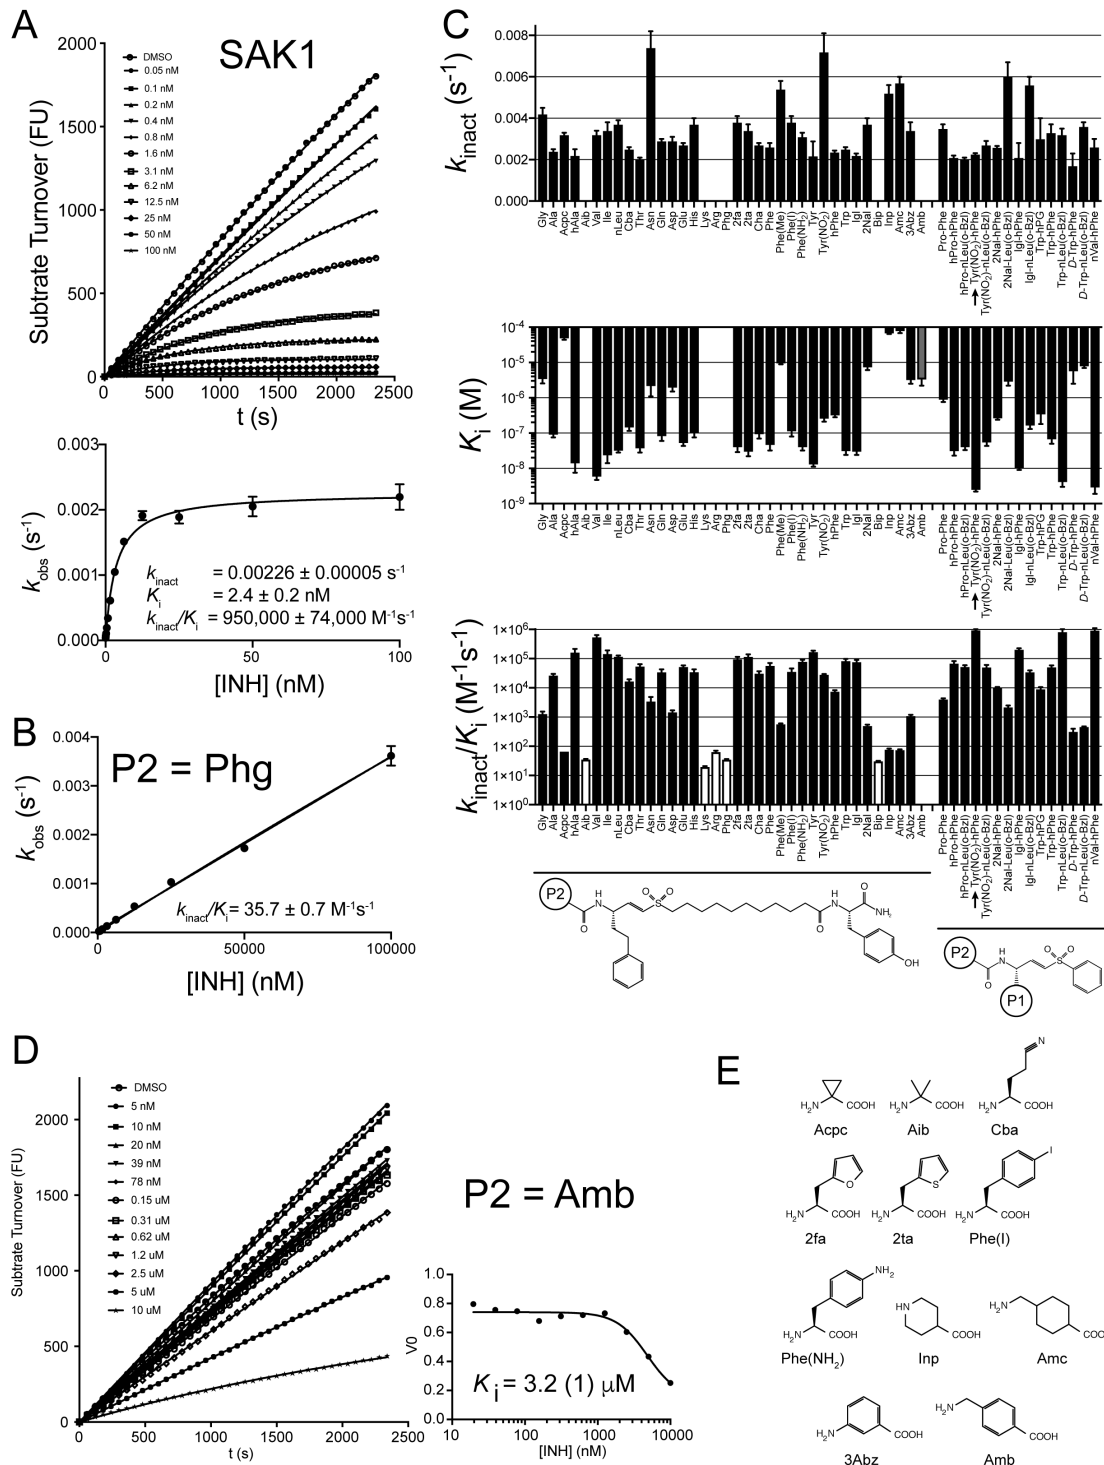

**Fig. 3. DPAP3 inhibitor specificity.** (A) Representative data showing time-dependent inhibition of DPAP3 by SAK1 (Tyr(NO<sub>2</sub>)-hPhe-VS). Each progress curve (FU vs. time) was fitted to Eq. 5 to obtain  $k_{obs}$  values (top graph). These were then fitted to Eqs. 6 and 7 to obtain  $k_{inact}$ ,  $K_i$  and  $k_{inact}/K_i$ . (B) Example of an inhibitor where no inhibitor saturation was observed (white bars in C). In this case,  $k_{obs}$  values were fitted to a linear model to obtain  $k_{inact}/K_i$ . (C) Inhibition constants determined for DPAP3. The general structure of the inhibitors is shown below the graphs. White bars correspond to inhibitors for which only  $k_{inact}/K_i$  values could be determined. The grey bar corresponds to the only inhibitor that showed a reversible mechanism of inhibition, i.e. only a  $K_i$  value could be determined. The inhibitor corresponding to SAK1 is indicated with an arrow. (D) No time-dependence inhibition of DPAP3 was observed with an inhibitor with a P2 Amb. Initial turnover rates ( $V_0$ ) were fitted to a reversible binding model to obtain  $K_i$ . (E) Structure of non-natural AAs present in the inhibitor library but not in the substrate library.

Overall, changes in P2 do not have a big influence in  $k_{\text{inact}}$  with the exceptions of Asn, Phe(Me), and Tyr(NO<sub>2</sub>), which significantly increase  $k_{\text{inact}}$ . Intriguingly, substrates containing the latter two P2 residues were the only substrates with a P2 aromatic residue that could be cleaved by DPAP3 with  $k_{\text{cat}}/K_{\text{m}} > 2,000 \text{ M}^{-1}\text{s}^{-1}$  (Table 1). In terms of  $K_{\text{i}}$ , we observed some SAR similarities between substrates and inhibitors: DPAP3 does not bind inhibitors with an N-terminal basic residue (Arg or Lys), but it is strongly inhibited ( $K_{\text{i}} < 35 \text{ nM}$ ) by aliphatic residues (Leu, nLeu, hAla, or Val). However, we measured potent inhibition of DPAP3 with aromatic residues in P2 such as Phe, Tyr or Trp ( $k_{\text{inact}}/K_{\text{i}} \geq 60,000 \text{ M}^{-1}\text{s}^{-1}$ ). Substrates with these P2 residues show relatively poor substrate turnover ( $k_{\text{cat}}/K_{\text{m}} \leq 2,000 \text{ M}^{-1}\text{s}^{-1}$ ). We also observed other discrepancies between substrates and inhibitors. For example, Thr in P2 results in a poor substrate (Fig. 1B) but a relatively potent inhibitor ( $k_{\text{inact}}/K_{\text{i}} = 55,000 \text{ M}^{-1}\text{s}^{-1}$ ). Inversely, DPAP3 cleaves Phg-hPhe-ACC and Phe(Me)-hPhe-ACC with a  $k_{\text{cat}}/K_{\text{m}}$  of 11,000 and 12,000  $\text{M}^{-1}\text{s}^{-1}$ , respectively, but the  $k_{\text{inact}}/K_{\text{i}}$  for the respective inhibitors are only 36 and 580  $\text{M}^{-1}\text{s}^{-1}$ . As shown in Fig. 4A, there is not a clear correlation between  $k_{\text{cat}}/K_{\text{m}}$  and  $k_{\text{inact}}/K_{\text{i}}$  for DPAP3 as a function of the P2 residue, however, P2 residues that make optimal substrates also make good inhibitors (Val, nVal, nLeu).

**Correlation between substrate turnover and inhibition for DPAP1 and CatC.** To determine whether the lack of correlation between  $k_{\text{cat}}/K_{\text{m}}$  and  $k_{\text{inact}}/K_{\text{i}}$  observed for DPAP3 is a common feature in DPAPs, we calculated apparent  $k_{\text{cat}}/K_{\text{m}}$  values for DPAP1 for the P2 substrate library based on the activity measurements previously reported at 1  $\mu\text{M}$  and the  $k_{\text{cat}}/K_{\text{m}}$  for hPro-hPhe-ACC[39]. We also measured accurate Michaelis Menten parameters for CatC for the P2 substrate library (Table S1 and Fig. S3), and  $k_{\text{inact}}$  and  $K_{\text{i}}$  values for DPAP1 and CatC for the P2 vinyl sulfone library (Table 2 and Fig. S2). As shown in Fig. 4B, we observed a good correlation between substrate turnover and  $k_{\text{inact}}/K_{\text{i}}$  for DPAP1, but for CatC we observed some

discrepancies (Fig. 4C), albeit not as pronounced as in the case of DPAP3. For example, the CatC  $k_{cat}/K_m$  for Phe(Me)-hPhe-ACC is 30-fold higher than for Phg-hPhe-ACC while the  $k_{inact}/K_i$  for Phe(Me)-hPhe-VS is 13-fold lower than for Phg-hPhe-VS, thus resulting in a 400-fold discrepancy in the changes in  $k_{cat}/K_m$  and  $k_{inact}/K_i$  values between these two P2 residues.

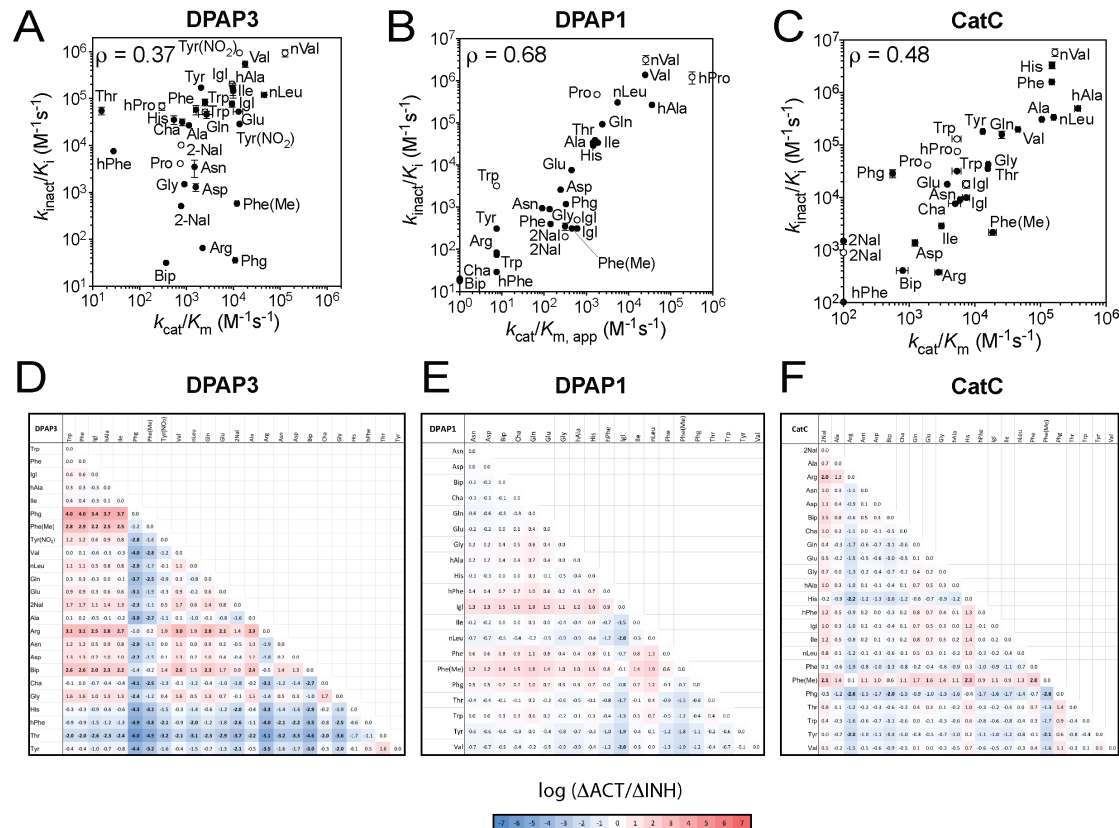

**Fig. 4. Comparison of catalytic efficiency and second order inhibition constants.** (A-C) Comparison of  $k_{inact}/K_i$  and  $k_{cat}/K_m$  for DPAP3 (A), DPAP1 (B) and CatC (C) between vinyl sulfone inhibitors and P2 substrate library. For DPAP1, apparent  $k_{cat}/K_m$  ( $k_{cat}/K_{m,app}$ ) were calculated based on previously reported turnover rates at  $1 \mu M$  [34].  $k_{cat}/K_{m,app}$  were calculated similarly for DPAP3 and CatC for P2 substrates whose activity was too low to obtain accurate Michaelis Menten parameters (i.e., substrates not present in Tables 1 and S2). Filled circles correspond to compounds belonging to the vinyl sulfone library (compounds in Table 2), and empty circles to inhibitors having a phenyl group in P1' (Table 3). The P2 residue is labelled next to each data point. Pearson correlation coefficients ( $\rho$ ) are shown for each protease. (D-F) Comparison of changes in substrate turnover relative to inhibitors potency for any pair of P2 residues. The log value of  $\Delta ACT/\Delta INH$  (Eq. 2) calculated for DPAP3 (D), DPAP1 (E) and CatC (F) are shown as a heat map with values above and below zero in red and blue, respectively. Each pairwise value showing more than a 100-fold discrepancy between activity and inhibition ( $\Delta ACT/\Delta INH > 100$  or  $< 0.01$ ) is highlighted in bold.

A systematic way to visualize discrepancies between substrate turnover and inhibition is to compare the fold different in  $k_{cat}/K_m$  with that in  $k_{inact}/K_i$  for any two P2 residues (Eq. 2).



$$\frac{\Delta\text{ACT}}{\Delta\text{INH}} = \frac{(k_{\text{cat}}/K_{\text{m}})_{\text{AA1}}/(k_{\text{cat}}/K_{\text{m}})_{\text{AA2}}}{(k_{\text{inact}}/K_{\text{i}})_{\text{AA1}}/(k_{\text{inact}}/K_{\text{i}})_{\text{AA2}}} \quad \text{Eq. 2}$$

We performed these pairwise calculations for each of the DPAPs studied here and have presented the results as heat maps in Fig. 4D-F. We observed significant and numerous discrepancies between substrates and inhibitors for DPAP3 (30 % of pairwise  $\Delta\text{ACT}/\Delta\text{INH} > 100$  or  $< 0.01$ ), almost no discrepancies for DPAP1 (only 1%  $\Delta\text{ACT}/\Delta\text{INH} > 10^2$  or  $< 10^{-2}$ ), and only a few for CatC (4% of  $\Delta\text{ACT}/\Delta\text{INH} > 100$  or  $< 0.01$ ). Overall, this study indicates that the level of correlation between  $k_{\text{cat}}/K_{\text{m}}$  and  $k_{\text{inact}}/K_{\text{i}}$  is protease dependent.

**Development of DPAP1 and DPAP3-selective inhibitors.** We next synthesized several inhibitors to determine whether the optimal nLeu(o-Bzl) P1 residue identified from the substrate screen could be used to increase the potency and specificity of inhibitors towards DPAP1 or DPAP3. We selected P2 AAs that were predicted to provide specificity towards DPAP1 (Pro and hPro) or DPAP3 (aromatic residues: Tyr(NO<sub>2</sub>), Trp, Igl and 2Nal) based on our substrate and inhibitor screening results. We also included in our analysis the previously synthesized compound JCP410 (nVal-hPhe-VS)[26], since nVal is one of the best P2 residues identified from the substrate screen. We determined the inhibition constants of these compounds for DPAP1, DPAP3, and CatC (Table 3 and Figs. 3 and S2). The major structural difference between these compounds and the inhibitor library is that they have a phenyl group in P' instead of a long aliphatic linker (Fig. 3A). This change usually increases the potency of compounds except in the context of a P2 Trp for DPAP3 or P2 Tyr(NO<sub>2</sub>)/2Nal for CatC (Tables 2 and 3). These exceptions indicate some level of interdependence between the prime and non-prime sites of DPAPs.

Compared to hPhe, P1 nLeu(o-Bzl) decreases  $k_{\text{inact}}/K_{\text{i}}$  value for DPAP3 by 4 to 18-fold except in the context of a P2 Trp where it increases it by 24-fold, or a P2 hPro where there is no



significant change (Table 3). These differences are mainly due to changes in  $K_i$  rather than  $k_{\text{inact}}$  and likely reflect cooperativity between the S1 and S2 pockets of DPAP3. However, in the case of DPAP1 and CatC, replacement of P1 hPhe with nLeu(o-Bzl) decreases  $K_i$ . Because of this P1-P2 interdependence, the most potent inhibitors for DPAP3 are either a combination of P2 Tyr(NO<sub>2</sub>) and P1 hPhe, i.e. SAK1, or P2 Trp and P1 nLeu(o-Bzl), resulting in  $k_{\text{inact}}/K_i$  values close to  $10^6 \text{ M}^{-1}\text{s}^{-1}$ . Importantly, nVal-hPhe-VS is as potent as these two inhibitors ( $k_{\text{inact}}/K_i = 940,000 \text{ M}^{-1}\text{s}^{-1}$ ), confirming that optimal inhibitors can be designed based on the structure of optimal substrates. These high second order rate constants are mainly driven by low  $K_i$  values (< 5 nM). While Trp-nLeu(o-Bzl), Igl-hPhe-VS and Tyr(NO<sub>2</sub>)-hPhe-VS show more than 100-fold selectivity for DPAP3 over DPAP1, only the latter is selective for DPAP3 compared to CatC (Table 3). On the other hand, nVal-hPhe-VS is equally potent for all DPAPs ( $k_{\text{inact}}/K_i = 1 \cdot 10^6$ ,  $3.2 \cdot 10^6$  and  $5.8 \cdot 10^6 \text{ M}^{-1}\text{s}^{-1}$  for DPAP3, DPAP1 and CatC, respectively) making it a highly potent but non-selective pan-DPAP inhibitor

Pro-hPhe-VS (SAK2) is 100-fold more selective towards DPAP1 than DPAP3, but only shows a 10-fold selectivity for DPAP1 compared to CatC. While replacing the P2 Pro of SAK2 with hPro increases the potency of the inhibitors towards DPAP1, this also results in some loss of specificity (Table 3). Overall, we were able to increase the potency of SAK2 (Pro-hPhe-ACC) towards DPAP1 by 7-fold by using the optimal P1 (nLeu(o-Bzl)) and P2 (hPro) residues identified from the substrate library screen[34], making hPro-nLeu(o-Bzl)-VS the most potent DPAP1 inhibitor identified so far ( $k_{\text{inact}}/K_i = 3.6 \cdot 10^6 \text{ M}^{-1}\text{s}^{-1}$ )[25,26,42]. However, this 7-fold increase in inhibitor potency between Pro-hPhe-VS and hPro-nLeu(o-Bzl)-VS was much lower than expected based on the 20- and 30-fold increase in substrate turnover reported between P1 hPhe and P1 nLeu(o-Bzl), and between P2 Pro and P2 hPro, respectively[34].

**Testing inhibitors specificity in live parasites.** We then tested the potency and selectivity of our DPAP1 and DPAP3 specific inhibitors in live parasites using the FY01 activity-based probe (ABP) in a competition labelling assay. ABPs are small molecule reporters of activity that use the catalytic mechanism of the targeted enzyme to covalently modify its active site. A reporter tag, usually a fluorophore or a biotin, allows visualization and quantification of the labelled enzyme in a gel-based assay[43]. FY01 is a cell-permeable fluorescent ABP that was initially developed for CatC[44] but it also labels *Plasmodium* DPAPs and the falcipains in live parasites[25,26]. The falcipains (FPs) are clan CA Cys proteases involved in haemoglobin degradation (FP2, FP2' and FP3)[45] and possibly RBC invasion (FP1)[46,47]. Binding of inhibitors into the active site of any of these Cys proteases prevents probe labelling resulting in the disappearance of a fluorescent band a SDS-PAGE gel.

Live parasites were treated with different concentrations of inhibitor for 30 min, and the residual level of DPAPs and FPs activities labelled with FY01 (Fig. S4) and quantified by densitometry. Dose response curves are shown in Fig. 5 and  $IC_{50}$  values reported in Table 4. Inhibitors with a P2 Pro or hPro are equally potent and inhibit DPAP1 at mid nanomolar concentrations. However, the P2 Pro makes the inhibitor more selective by blocking inhibition of the FPs. Compounds with a P2 Trp or Tyr(NO<sub>2</sub>) are highly specific for DPAP3 in intact parasites. Surprisingly, Trp-hPG-VS is by far the most potent DPAP3 inhibitor in intact parasites ( $IC_{50} = 1.4$  nM) despite being 5 to 100-fold less potent than Trp-nLeu(o-Bzl)-VS or Trp-hPhe-VS against DPAP3 (see  $k_{inact}/K_i$  values in Table 3). This suggests that either this compound is metabolically more stable and/or that decreasing the hydrophobicity of the P1 residue enhances the cell permeability of the compound. Indeed, compounds need to cross four membranes to reach DPAP3: the RBC, parasitophorous vacuole, and parasite plasma membranes, plus the membrane of the apical organelle where DPAP3 resides[21]. (The parasitophorous vacuole is a membrane bound structure within which the parasite growth and

multiply isolated from the RBC cytosol.) It is also likely that the apparent increased potency of Trp-hPG-VS in live parasites might be due to its accumulation into the DPAP3 acidic organelle via protonation of its free amine. However, we predict that this lysosomotropic effect likely occurs for all DPAP inhibitors presented here.

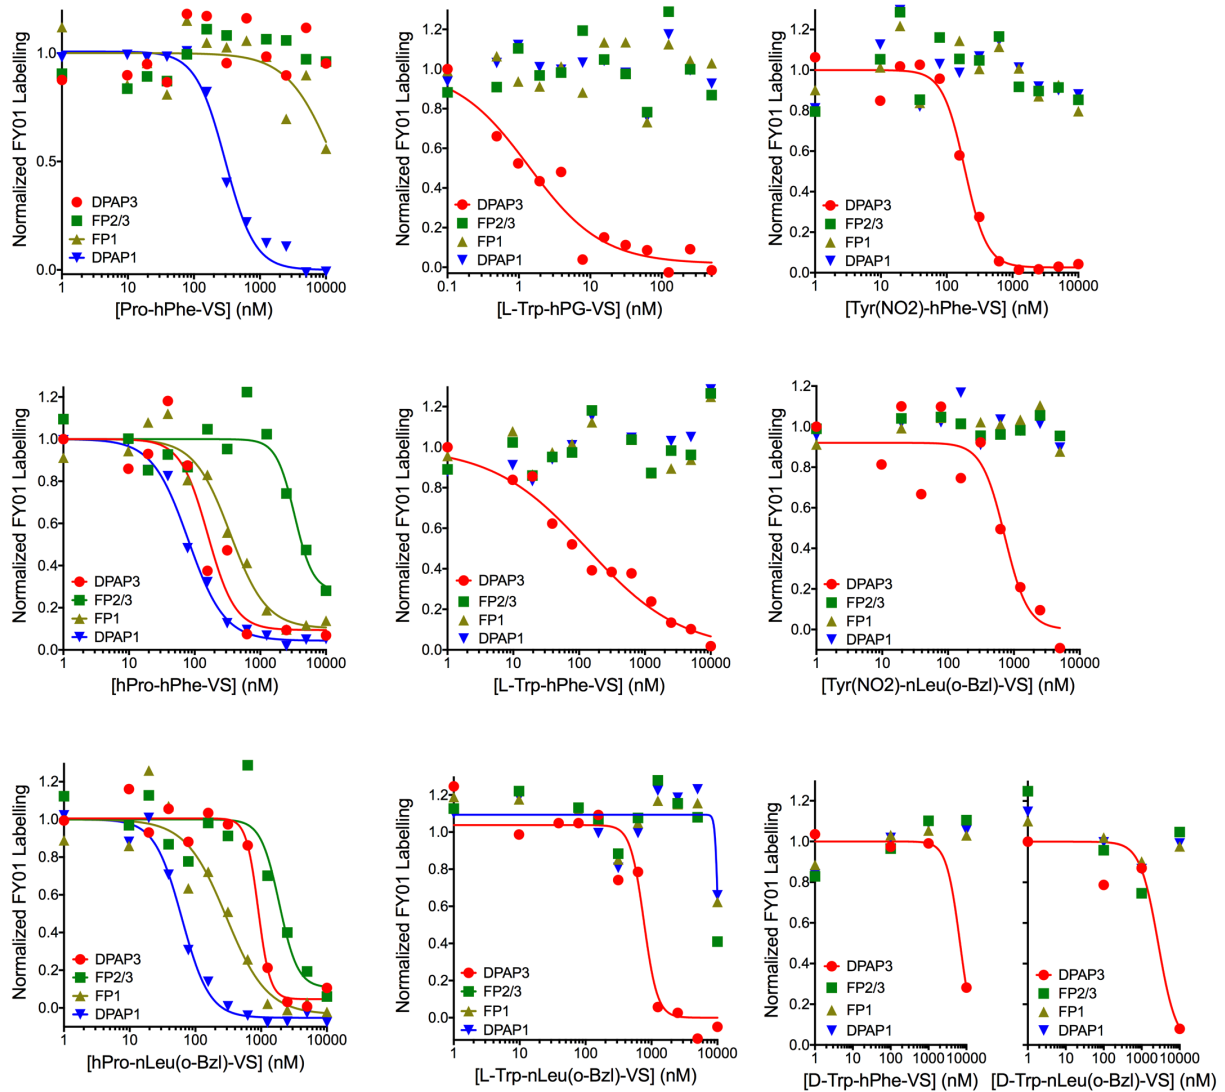

**Fig. 5. Selective inhibition of DPAP1 or DPAP3 in live parasites.** Intact mature schizonts were pre-treated for 30 min with a dose response of inhibitor followed by 1 h treatment with FY01 to label the residual level of DPAP1, DPAP3, FP1 and FP2/3 activities. Fluorescent bands corresponding to the different cysteine proteases labelled by the probe (Fig. S4) were quantified by densitometry using ImageJ, and the fluorescence values normalized to the DMSO control. IC<sub>50</sub> values are reported in Table 4. Note that control inhibitors containing *D*-Trp are more than 1000-fold less potent than those with *L*-Trp.

## Correlation between PS-SCL of substrates and inhibitors for other Cys proteases. To

determine whether the discrepancy observed between substrate and inhibitor specificities for DPAP3 (Fig. 4) is a phenomenon observed in other proteases, we look at previously published literature about two of the most commonly studied families of Cys proteases, i.e. caspases and cathepsins. Several studies on caspases[48,49] and cathepsins[50] have shown that inhibitors designed based on the structure of specific substrates do not retain their selectivity. Also, the sequence of an optimal substrate or inhibitor might render the equivalent inhibitor or substrate completely inactive[49-51]. We therefore compared previously published specificity data obtained from PS-SCL libraries of ACC substrates and covalent inhibitors for these two protease families (Fig. 6).

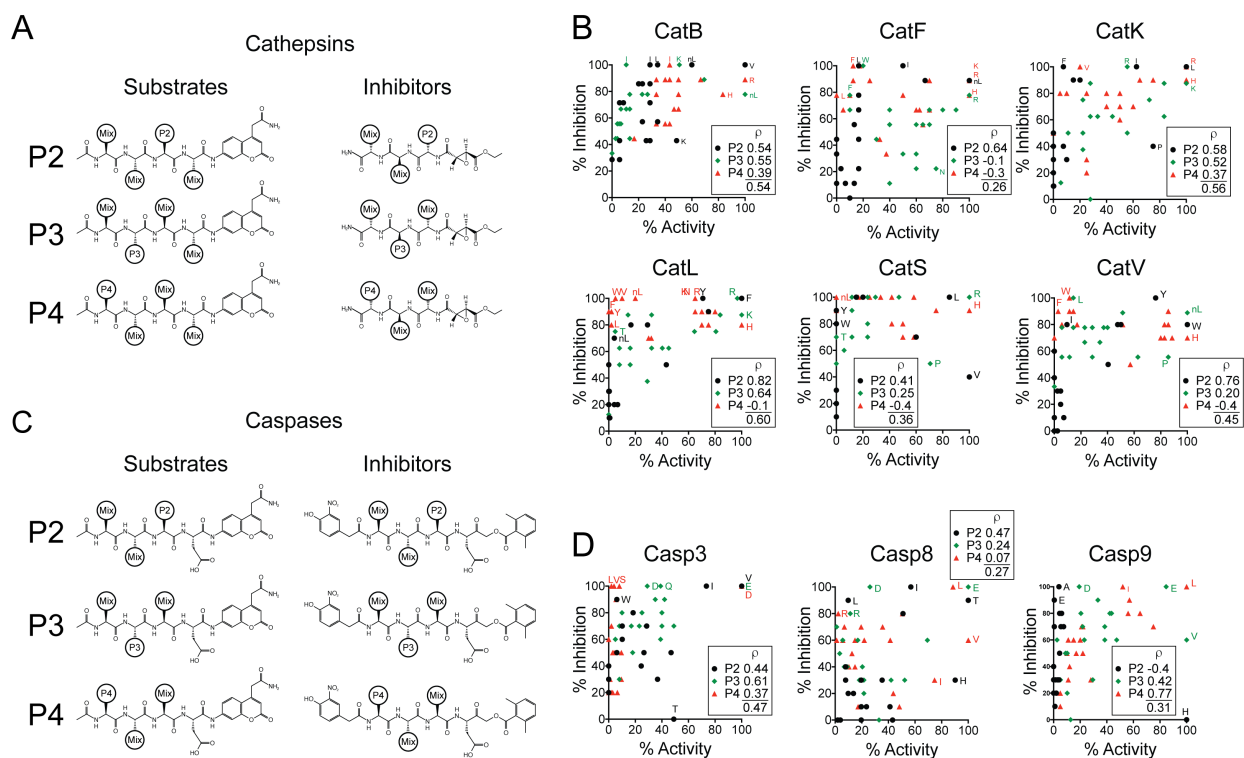

**Fig. 6. Comparison of substrate and inhibitor specificity for cathepsins and caspases.**

(A and C) Structure of the PS-SCL of ACC substrates and inhibitors used to determine the specificity of cathepsins and caspases. For the cathepsins, substrates were screened at 250  $\mu$ M, and the inhibitors at 10  $\mu$ M using an ABP competition assay. For caspases, substrates were screened at 50  $\mu$ M and inhibitors at 50-500 nM. (B and D) Correlation between substrate turnover and inhibition. For each protease and P2-P4 position, the maximum level of activity and inhibition at each AA position was normalized to 100%. Pearson correlation coefficients ( $\rho$ ) are shown next to the legend of each graph for each position. The lower  $\rho$  value was obtained by combining all the P2-P4 data points for each protease. Residues showing maximum activity or inhibition are labelled at each position along with specific AAs that illustrate particularly bad correlation between the levels of activity and inhibition.

To simplify our analysis, we only compared data obtained from natural amino acids. For Cys cathepsins (CatB, CatF, CatK, CatL, CatS, and CatV), we compared the substrate specificity data obtained from the Craik lab[50] with the inhibitor specificity data obtained from the Bogyo lab using an epoxysuccinate library[36] (Fig. 6A-B). For caspases, we compared the specificity obtained for caspases 3, 8 and 9 (Casp3, Casp8 and Casp9, respectively) using a library of acyloxymethyl ketone inhibitors from the Bogyo lab[51], with the substrate specificity results from the Drag lab [52] (Fig. 6C-D). For each protease, we normalized the level of activity and inhibition to that of the best natural amino acid at each P2-P4 position. Although it is difficult to draw specific conclusions from these PS-SCL results because each activity or inhibition value represent the effect of a pool of 400-8000 different molecules rather than an individual one, the lack of correlation between the levels of activity and inhibition shown in Fig. 6 is nonetheless quite surprising. Indeed, for most proteases and P2-P4 positions, the Pearson coefficients are below 0.7. Similar to what we observed for DPAPs (Fig. 4), the peptide sequence of inhibitors that is equivalent to that of optimal substrates generally yields very potent inhibitors. This is true for most proteases and for each position (with the exception of P2 in Casp9). However, for all proteases, 90-100 % inhibition was achieved with peptide sequences that were poorly cleaved as substrates (< 10 % activity). Also, at each P2-P4 position, we could observe good inhibition with sequences belonging to poor substrates. Interestingly, for most proteases only a few peptide sequences showed good turnover rates but poor inhibition, with the exception of Casp8, and the P3 position for CatF. There are also a few striking individual residues, such as P2 His for caspases 8 and 9, or P2 Thr for Casp3 and P2 Val for CatS, that show good activity but no inhibition. Finally, we would also like to draw attention to the fact that the P2 and P4 positions are particularly important for modulating the potency of inhibitors against Casp9 and Casp3, respectively. However, these positions have little effect on substrate turnover.

That said, there are substantial structural differences between the substrate and inhibitor libraries shown in Fig. 6 that can explain this lack of correlation. For epoxysuccinate inhibitors, the polarity of the peptide backbone goes in the opposite direction as that of natural substrates, these compounds do not have a P1 residue, and the warhead strands the S1 and S1' pocket. This can have very drastic influence on the preferred amino acid residue at each site, especially at the P2 and P3 position. Also, the position of the site of nucleophilic attack by the catalytic Cys at one of the epoxide carbons does not match the position of the scissile bond carbonyl in a peptide substrate and can therefore explain the differences in specificity between substrate and inhibitors. This is therefore an excellent example showing how the choice of warhead can have drastic consequences when the structural information of a substrate wants to be used to develop covalent inhibitors.

As pointed above, differences in specificity between substrate and inhibitors have been pointed out previously for caspases. A possible explanation to explain the differences observed in Fig. 6 is that the P4 capping group is different between the substrate (acetyl group) and inhibitor (2-(4-hydroxy-3-nitrophenyl)-acetyl group) libraries. This might strongly influence how side chains, specially at the P4 position, bind into the different active site pockets. Indeed, using different capping group in PS-CSL of substrates has been shown to result in different amino acid preferences in the S4 pocket of the Zika virus NS2B-NS3 protease[53,54]. Also, if cooperativity exist between the P4 and other positions, the influence of the capping group on the S4 pocket specificity will also influence that of other pockets. Finally, the difference in specificity might be due to cooperativity between the prime and non-prime sites. In this case the choice of electrophile used might change the amino acid preference.

## Discussion

This study provides the first characterization of the specificity of DPAP3, a cysteine protease important for efficient invasion of RBCs by the malaria parasite[21]. DPAP3 is a highly efficient proteolytic enzyme showing similar  $k_{\text{cat}}$  and  $k_{\text{cat}}/K_m$  values than either DPAP1 or CatC when optimal substrates are used (Table 1). In general, DPAP3 has a narrower substrate specificity than either DPAP1 or CatC, and it preferentially cleaves substrates with aliphatic residues at the N-terminus. Our study also shows similar P1 substrate specificity across all DPAPs, i.e. a strong preference for basic or long aromatic residues. DPAP3 was the only DPAP able to cleave some substrates with aromatic P2 residues (Tyr, Phe(Me), Phg), albeit with relatively low turnover rates. Surprisingly, vinyl sulfone inhibitors with aromatic residues are as potent as compounds with optimal P2 residues identified from the substrate screen, but in addition, these compounds are highly specificity for DPAP3 compared to DPAP1, CatC, or other malarial cysteine proteases (FPs). The previously described DPAP1 inhibitor SAK2 (Pro-hPhe-VS) shows the greatest specificity for DPAP1 in live parasites. Incorporation of optimal P1 (nLeu(o-Bzl)) and P2 (hPro) residues identified from the substrate screens improves the potency of DPAP1 inhibitors both *in vitro* and in live parasites, but also results in some loss in specificity (Table 3 and Fig. 5).

Despite being highly potent and specific DPAP1 and DPAP3 inhibitors, these compounds only show antiparasitic activity at mid to high micromolar concentrations[21,25,26], probably due to metabolic stability issues. Indeed, we have previously shown that this is the case for Pro-hPhe-VS, which is not able to sustain target inhibition in live parasites[25]. A possible cause for this instability is the presence of multiple aminopeptidases in the malaria parasite that might cleave the amide bond of these compounds[55], thus preventing them to bind into the DPAPs active sites. Nonetheless, this study provides a very strong SAR foundation to develop potent non-peptidic inhibitors able to

sustain DPAPs inhibition. From a drug development point of view, our SAR studies indicate that inhibitors with short aliphatic P2 residues strongly inhibit both DPAPs (Fig. 4E), indicating that potent pan-DPAP inhibitors can easily be developed. Unfortunately, we did not identify any clear P1 or P2 residue that would discriminate malarial DPAPs from host CatC. Therefore, further studies are required to determine whether differences in specificity in the prime binding pockets can be exploited to develop parasite specific inhibitors.

It is however important to point out that given the short-term treatment requirement for antimalarial therapy (single dose or less than 3 doses in 3 days), we think it is unlikely that inhibition of CatC would lead to adverse side effects. Firstly, highly specific DPAP inhibitors might not be necessary given that a high level (> 95 %) of sustained CatC inhibition is required to see a decrease in the activity of serine proteases activated by CatC[56]. Secondly, activation of granule serine proteases by cathepsin C takes place during cell differentiation in the bone marrow, and a decrease in the level of serine proteases activity in circulating immune cells is only achieved after more than 2 weeks of daily treatment with CatC inhibitors[19]. And thirdly, no signs of toxicity were observed in phase I clinical trials when volunteers were treated daily for more than 3 weeks with CatC inhibitors, albeit some on-target side effects such as plantar and palmar epithelial desquamation were observed in some instances[18,19]. However, these side effects were not observed in volunteers that received a single dose of CatC inhibitor, nor within the first week of daily treatments.

Positional scanning substrate libraries have been used over the last 20 years[29-31] to determine the specificity of proteases and guide the synthesis of inhibitors. Here we have shown that vinyl sulfone inhibitors containing P1 and P2 residues corresponding to optimal DPAP1 or DPAP3 substrates result in extremely potent inhibitors. However, our studies clearly identified differences in specificity between substrates and inhibitors, especially for DPAP3,



but also for CatC and other cysteine proteases (Figs. 4 and 6). A reason why this phenomenon might not have been more broadly reported in the literature is because, in general, either substrate or inhibitor libraries are used to determine the specificity of a protease, but not both. Also, inhibitors are not usually designed based on the structure of non-optimal substrates, and as pointed above, inhibitors that mimic optimal substrates are generally very potent. That said, there are multiple reasons that can account for discrepancies in specificity between substrates and inhibitors:

First, although the substrate and inhibitor libraries used in this study have equivalent P1 and P2 residues, the structural features that bind into the S' pockets are quite different. Therefore, if the specificity of a protease shows interdependence between its prime and non-prime binding pockets, it might explain differences in specificity. This is likely the case for DPAPs since we observed a 50-fold increase in  $k_{\text{cat}}$  between the Phe-Arg-ACC and Phe-Arg- $\beta$ NA substrates, which only differ in the structure of the fluorophore that binds in the S1' pocket (Table 1). Also, while we observed very good correlation between  $k_{\text{cat}}/K_m$  and  $k_{\text{inact}}/K_i$  of DPAP1 for the P2 substrate and VS library (compounds in Table 2), in the context of a phenyl group in P1' (inhibitors in Table 3), we observed clear discrepancies between substrates and inhibitors (Fig. 4B).

Second, the position of the electrophilic warhead within the active site might differ from that of the scissile bond in a substrate, especially in terms of distance and orientation relative to the catalytic Cys. This positioning might be differently affected by changes in the P1 and P2 residues of substrates and inhibitors. Indeed, a recent study on caspases has shown that acyloxymethyl ketone covalent inhibitors might act through a reversible mechanism even if they are designed based on the sequence of optimal substrates[49]. Also, ABPs designed to profile deubiquitinating proteases by conjugating an electrophile to the C-terminal of ubiquitin have been shown to label different subset of enzymes depending on the warhead used[57].

Third, substrate turnover by Cys and Ser proteases requires two different chemical steps: First, nucleophilic attack of the peptide bond by the catalytic residue to form the acyl intermediate and release of the C-terminal product of proteolysis; and second, hydrolysis of the acyl intermediate by an activated water molecule to reconstitute the free enzyme and release the N-terminal product of the reaction (Scheme 1). Therefore, peptide sequences that are poorly turned over because of a very slow acyl intermediate hydrolysis step might still be very good to design covalent inhibitors. For example, a substrate that displaces the catalytic water from the active site upon formation of the acyl intermediate will be very poorly turned over.

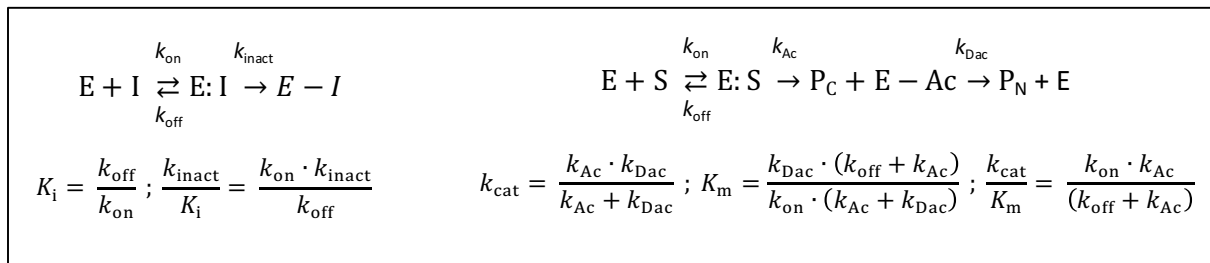

**Scheme 1. Comparison between irreversible inhibition and substrate turnover kinetic constants.** E, I, E:I and E-I represent free enzyme, inhibitor, inhibitor associated with the enzyme, and enzyme covalently modified by the inhibitor, respectively. S, E:S, E-Ac, P<sub>C</sub> and P<sub>N</sub> represent the substrate, the Michaelis Menten enzyme-substrate complex, the acyl intermediate, and the C- and N-terminal products of proteolysis, respectively;  $k_{\text{on}}$  and  $k_{\text{off}}$  the association and dissociation rate constant for substrates or inhibitors; and  $k_{\text{Ac}}$  and  $k_{\text{Dac}}$  the kinetic constants for formation of the acyl intermediate and its hydrolysis, respectively.

And fourth, the reaction mechanism between covalent inhibition and substrate turnover are quite different making  $k_{\text{cat}}$ ,  $K_m$ , and  $k_{\text{cat}}/K_m$  not directly comparable with  $k_{\text{inact}}$ ,  $K_i$ , and  $k_{\text{inact}}/K_i$  (Scheme 1).  $k_{\text{cat}}$ ,  $K_m$ , and  $k_{\text{cat}}/K_m$  are empirical parameters obtained under steady state conditions while  $k_{\text{inact}}$ ,  $K_i$ , and  $k_{\text{inact}}/K_i$  are real kinetic and thermodynamic constants that cannot be measured under steady state conditions since covalent inhibitors deplete the concentration of free enzyme over time.  $k_{\text{cat}}$  might be equivalent to  $k_{\text{inact}}$  only if  $k_{\text{Ac}} \ll k_{\text{Dac}}$ , i.e. formation of the acyl intermediate is the rate limiting step;  $K_m$  might be equivalent to  $K_i$  only if  $k_{\text{Ac}} \ll k_{\text{off}}$  and  $k_{\text{Ac}} \ll k_{\text{Dac}}$ ; and  $k_{\text{cat}}/K_m$  might be equivalent to  $k_{\text{inact}}/K_i$  only if  $k_{\text{off}} \gg k_{\text{Ac}}$ . Although these conditions might be met for certain substrates, the relative magnitudes of all these rate constants depend on

the substrate sequence. For example, detailed pre-steady state kinetics and kinetic isotope effects studies on CatC have shown that the rate limiting step in the turnover of dipeptidic AMC substrates can be either formation of the acyl intermediate, its hydrolysis, or a contribution of both, depending on the nature of the P1 residue[58,59].

Although several studies have compared the potency of inhibitors to the turnover of equivalent substrates for selected peptide sequences, to the best of our knowledge this is the first study that systematically compares the potency of a peptide-based covalent inhibitor library to the turnover efficiency of an equivalent substrate library. We think that the discrepancies observed here between  $k_{\text{cat}}/K_m$  and  $k_{\text{inact}}/K_i$  are likely to be present in other proteases, as shown for cysteine cathepsins and caspases, but the level of discrepancy will be dependent on the protease studied as well as on the type of substrate and covalent inhibitor that are being compared, especially if there is a high level of cooperativity between the prime and non-prime binding pockets.

Overall, our detailed study on DPAPs specificity and our analysis of specificity results obtained from PS-SCL clearly indicate that there can be very significant differences in specificity between substrates and covalent inhibitors. Although it is now well established that highly potent inhibitors can be developed based on the structure of optimal substrates, this might sometimes result in some loss of specificity. This study clearly demonstrates that optimal inhibitors with improved specificity can be developed based on the structure of relatively poor substrates. Therefore, we strongly recommend using PS-SCL libraries of inhibitors rather than substrates if the goal is to design specific inhibitors and ABPs, or select warheads and capping groups (N- and C-terminal) that mimic as well as possible the structure of substrates used to determine the specificity of a protease to design covalent inhibitors since these will be less likely to influence inhibitor specificity.

## Materials and Methods

**Reagents.** The syntheses of the DPAP substrate library and that of Val-Arg-ACC, Phe-Arg-ACC, Tyr(NO<sub>2</sub>)-hPhe-ACC[39] and (PR)<sub>2</sub>Rho[40] have been previously described. The syntheses of additional substrates used in this study are described in the supplementary methods and were synthesized following previously published methods[34][60]. The syntheses of the vinyl sulfone inhibitor library, SAK2, SAK1, *L*-WSAK and *D*-WSAK were also previously described[21][26]. The additional DPAP inhibitors used in this study were synthesized following similar methods[61]. The synthesis and characterization of these inhibitors and their synthetic intermediates are described in detail in the supplementary methods. The Phe-Arg-βNA and Gly-Arg-AMC substrates were purchased from Sigma. Recombinant DPAP3 was expressed in insect cells using the baculovirus system as recently described[21]. Bovine CatC was purified to homogeneity from spleen by modification of a method described previously[62][63].

**Recombinant DPAP3 active site titration.** Recombinant DPAP3 was expressed in SF9 insect cells and purified from the culture supernatant by sequential ion exchange, Ni-NTA, and size exclusion chromatography as previously described[21]. To accurately determine the concentration of active DPAP3 in our enzyme stocks we used the FY01 ABP. Because ABPs only react with the active form of an enzyme and covalently modify its active site, in this case the catalytic Cys, they can be used to perform accurate active site titrations.

Our stock of DPAP3 was diluted 20-fold in assay buffer (100 mM sodium acetate, 100 mM NaCl, 5 mM MgCl<sub>2</sub>, 1 mM EDTA, 0.1 % CHAPS, and 5 mM DTT at pH 6), pre-treated for 30 min with DMSO or 1 μM SAK1 (Tyr(NO<sub>2</sub>)-hPhe-VS), and DPAP3 labelled with 1 μM FY01 for 1 h at RT. These samples were run on a SDS-PAGE gel along with a serial dilution of free probe (1.5-100 nM). In-gel fluorescence was measured using a Bio-Rad

PharosFX flat-bed scanner and the intensity of the fluorescent bands quantified using ImageJ. The fluorescent signal from the free probe was used as a calibration curve and compared to the difference in signal between the DMSO and SAK1 treated DPAP3 (Fig. S5). Using this method, we determined that our DPAP3 stock contained 840 nM of active protease.

**Substrate turnover assay.** The substrate library was screened in triplicate at 1  $\mu$ M substrate and 1 nM DPAP3 in assay buffer. Substrate turnover was measured over 30 min at RT using a SpectroMax M5e plate reader:  $\lambda_{\text{ex}} = 355$  nm,  $\lambda_{\text{em}} = 460$  nm, emission filter 455 nm, for ACC or AMC (7-amino-4-methylcoumarin) substrates;  $\lambda_{\text{ex}} = 315$  nm,  $\lambda_{\text{em}} = 355$  nm, emission filter 420 nm, for Phe-Arg- $\beta$ NA); and  $\lambda_{\text{ex}} = 492$  nm,  $\lambda_{\text{em}} = 523$  nm, emission filter 520 nm for (PR)<sub>2</sub>Rho. Calibration curves of free  $\beta$ NA ( $\beta$ -naphthylamide) and ACC (0-500 nM) under the same assay conditions were performed to convert the turnover rate measured as fluorescent units per second into moles per second. The determine  $k_{\text{cat}}$  and  $K_{\text{m}}$  values, substrate turnover was measured at different substrate concentrations in assay buffer using 1 nM of DPAP3 or 1 nM of bovine CatC. The initial velocities were then fitted with Prism to the Michaelis Menten Eqs. 3 or 4 to obtain accurate  $k_{\text{cat}}$  and  $K_{\text{m}}$  or  $k_{\text{cat}}/K_{\text{m}}$  values, respectively. A minimum of three replicates were performed for each substrate.

$$V_i = \frac{k_{\text{cat}} \cdot Et \cdot [S]}{K_{\text{m}} + [S]} \quad \text{Eq. 3}$$

$$V_i = \frac{(k_{\text{cat}}/K_{\text{m}}) \cdot Et \cdot [S]}{1 + \frac{[S]}{K_{\text{m}}}} \quad \text{Eq. 4}$$

$V_i$  is the initial velocity and Et the total concentration of active protease.

**Irreversible inhibition assay.** To determine the inhibition constants of vinyl sulfone inhibitors against DPAP3, 2.2  $\mu$ M of Met-nLeu(o-Bzl)-ACC (0.25 x  $K_{\text{m}}$ ) was mixed with a dose response

of inhibitor in assay buffer, and the turnover rate measured over 40 min at RT after addition of 0.2 nM DPAP3. The data was analyzed according to the irreversible inhibition model shown in Eq. 1. First, the progress curves (fluorescent units vs. time) were fitted to Eq. 5, where  $F$  is the measured fluorescence at time  $t$ ,  $F_0$  the initial fluorescence,  $V_0$  the initial turnover rate, and  $k_{\text{obs}}$  the observed second order rate constant of inhibition measured at each inhibitor concentration[64].

$$(F - F_0) = V_0 \frac{1 - e^{-k_{\text{obs}} \cdot t}}{k_{\text{obs}}} \quad \text{Eq. 5}$$

Second,  $k_{\text{obs}}$  values were fitted to Eqs. 6 or 7. to obtain the  $k_{\text{inact}}$  and  $K_i$  or  $k_{\text{inact}}/K_i$  values, respectively.

$$k_{\text{obs}} = \frac{k_{\text{inact}} \cdot [\text{INH}]}{K_i + [\text{INH}]} \quad \text{Eq. 6}$$

$$k_{\text{obs}} = \frac{(k_{\text{inact}}/K_i) \cdot [\text{INH}]}{1 + \frac{[\text{INH}]}{K_i}} \quad \text{Eq. 7}$$

Inhibition constants for DPAP1 and CatC were determined in a similar way but using  $0.25 \times K_m$  concentrations of the Pro-Arg-AMC (20  $\mu\text{M}$ ) and Gly-Arg-AMC (15  $\mu\text{M}$ ), respectively. Inhibition of DPAP1 was directly measured in parasite lysates diluted 100-fold in assay buffer using the DPAP1-selective substrate Pro-Arg-AMC[41]; 0.2 nM of CatC was used for these inhibition studies.

**Measurement of inhibitor specificity in biological samples.** Inhibition of *Plasmodium* DPAPs and the falcipains in intact parasites was measured using the FY01 ABP in competition

assays as previously described[25,26]. Because DPAP3 is maximally expressed in very mature schizonts[6], labelling was performed after treating parasites with 1  $\mu$ M of Compound 2, a cGMP-dependent protein kinase inhibitor that arrest parasite development 15-30 min before they egress from the infected RBC[65]. For each sample, 5  $\mu$ L of percoll-purified schizonts were diluted in 45  $\mu$ L of RPMI (Gibco), pre-treated for 30 min with a dose response of inhibitor, and labelled for 1 h with 1  $\mu$ M FY01. Samples were then boiled for 10 min in loading buffer and run on a 12 % SDS-PAGE gel. Fluorescently labelled proteases in the gel were detected using a Bio-Rad PharosFX flatbed fluorescence scanner.

## **Acknowledgement**

We would like to thank the Wellcome Trust and Royal Society for funding this research through the Sir Henry Dale Fellowship 099950. We would also like to thank Erasmus for funding L.E.d.V. and L.K. internship in Dr. Edgar Deu's laboratory. M.M. and M.H. were supported by project ChemBioDrug CZ.02.1.01/0.0/0.0/16\_019/0000729 from the European Regional Development Fund (OP RDE) and by the institutional project RVO 61388963.

## **Author Contributions**

E.D. planned, performed, and managed experiments, analysed data and wrote the manuscript. L.E.d.V., L.K., and C.L. performed experiments. M.I.S., F.Y., S.A.K., M.P., K.G. synthesized compounds under the supervision of M.B. and M.D. M.H. and M.M. contributed reagents. All authors revised the manuscript.

## References

- 1 World Health Organization (2017) World Malaria Report 2016. 1–186.
- 2 Bhatt S, Weiss DJ, Cameron E, Bisanzio D, Mappin B, Dalrymple U, Battle K, Moyes CL, Henry A, Eckhoff PA, Wenger EA, Briët O, Penny MA, Smith TA, Bennett A, Yukich J, Eisele TP, Griffin JT, Fergus CA, Lynch M, Lindgren F, Cohen JM, Murray CLJ, Smith DL, Hay SI, Cibulskis RE & Gething PW (2015) The effect of malaria control on *Plasmodium falciparum* in Africa between 2000 and 2015. *Nature* **526**, 207–211.
- 3 Ranson H & Lissenden N (2016) Insecticide resistance in African Anopheles mosquitoes: A worsening situation that needs urgent action to maintain malaria control. *Trends in Parasitology* **32**, 187–196.
- 4 Ashley EA, Dhorda M, Fairhurst RM, Amaratunga C, Lim P, Suon S, Sreng S, Anderson JM, Mao S, Sam B, Sopha C, Chuor CM, Nguon C, Sovannaroth S, Pukrittayakamee S, Jittamala P, Chotivanich K, Chutasmit K, Suchatsoonthorn C, Runcharoen R, Hien TT, Thuy-Nhien NT, Thanh NV, Phu NH, Htut Y, Han K-T, Aye KH, Mokuolu OA, Olaosebikan RR, Folaranmi OO, Mayxay M, Khanthavong M, Hongvanthong B, Newton PN, Onyamboko MA, Fanello CI, Tshefu AK, Mishra N, Valecha N, Phyo AP, Nosten F, Yi P, Tripura R, Borrmann S, Bashraheil M, Peshu J, Faiz MA, Ghose A, Hossain MA, Samad R, Rahman MR, Hasan MM, Islam A, Miotto O, Amato R, MacInnis B, Stalker J, Kwiatkowski DP, Bozdech Z, Jeeyapant A, Cheah PY, Sakulthaew T, Chalk J, Intharabut B, Silamut K, Lee SJ, Vihokhern B, Kunasol C, Imwong M, Tarning J, Taylor WJ, Yeung S, Woodrow CJ, Flegg JA, Das D, Smith J, Venkatesan M, Plowe CV, Stepniewska K, Guerin PJ, Dondorp AM, Day NP, White NJ Tracking Resistance to Artemisinin Collaboration (TRAC) (2014) Spread of artemisinin resistance in *Plasmodium falciparum* malaria. *N Engl J Med* **371**, 411–423.
- 5 Wells TNC, Hooft van Huijsduijnen R & Van Voorhis WC (2015) Malaria medicines: a glass



- half full? *Nat Rev Drug Discov* **14**, 424–442.
- 6 Bozdech Z, Llinás M, Pulliam BL, Wong ED, Zhu J & Derisi JL (2003) The transcriptome of the intraerythrocytic developmental cycle of *Plasmodium falciparum*. *PLoS Biol.* **1**, e5–16.
- 7 Young JA, Fivelman QL, Blair PL, la Vega de P, Le Roch KG, Zhou Y, Carucci DJ, Baker DA & Winzeler EA (2005) The *Plasmodium falciparum* sexual development transcriptome: a microarray analysis using ontology-based pattern identification. *Mol Biochem Parasitol* **143**, 67–79.
- 8 Gutmann HR & Fruton JS (1948) On the proteolytic enzymes of animal tissues; an intracellular enzyme related to chymotrypsin. *J Biol Chem* **174**, 851–858.
- 9 Wiggans DS, Winitz M & Fruton JS (1954) Action of cathepsin C on dipeptide esters. *Yale J Biol Med* **27**, 11–19.
- 10 Korkmaz B, Caughey GH, Chapple I, Gauthier F, Hirschfeld J, Jenne DE, Kettritz R, Lalmanach G, Lamort A-S, Lauritzen C, Łęgowska M, Lesner A, Marchand-Adam S, McKaig SJ, Moss C, Pedersen J, Roberts H, Schreiber A, Seren S & Thakker NS (2018) Therapeutic targeting of cathepsin C: from pathophysiology to treatment. *Pharmacol Ther*
- 11 McGuire MJ, Lipsky PE & Thiele DL (1993) Generation of active myeloid and lymphoid granule serine proteases requires processing by the granule thiol protease dipeptidyl peptidase I. *J Biol Chem* **268**, 2458–2467.
- 12 Kummer JA, Kamp AM, Citarella F, Horrevoets AJ & Hack CE (1996) Expression of human recombinant granzyme A zymogen and its activation by the cysteine proteinase cathepsin C. *J Biol Chem* **271**, 9281–9286.
- 13 Pham CT & Ley TJ (1999) Dipeptidyl peptidase I is required for the processing and activation of granzymes A and B in vivo. *Proc Natl Acad Sci USA* **96**, 8627–8632.
- 14 Adkison AM, Raptis SZ, Kelley DG & Pham CTN (2002) Dipeptidyl peptidase I activates neutrophil-derived serine proteases and regulates the development of acute experimental

- arthritis. *J Clin Invest* **109**, 363–371.
- 15 Guay D, Beaulieu C, Truchon J-F, Jagadeeswar Reddy T, Zamboni R, Bayly CI, Methot N, Rubin J, Ethier D & David Percival M (2009) Design and synthesis of dipeptidyl nitriles as potent, selective, and reversible inhibitors of cathepsin C. *Bioor Med Chem Lett* **19**, 5392–5396.
- 16 Lainé D, Palovich M, McClelland B, Petitjean E, Delhom I, Xie H, Deng J, Lin G, Davis R, Jolit A, Nevins N, Zhao B, Villa J, Schneck J, McDevitt P, Midgett R, Kmett C, Umbrecht S, Peck B, Davis AB & Bettoun D (2011) Discovery of novel cyanamide-based inhibitors of cathepsin C. *ACS Med Chem Lett* **2**, 142–147.
- 17 Furber M, Tiden A-K, Gardiner P, Mete A, Ford R, Millichip I, Stein L, Mather A, Kinchin E, Luckhurst C, Barber S, Cage P, Sanganee H, Austin R, Chohan K, Beri R, Thong B, Wallace A, Oreffo V, Hutchinson R, Harper S, Debreczeni J, Breed J, Wissler L & Edman K (2014) Cathepsin C inhibitors: property optimization and identification of a clinical candidate. *J Med Chem* **57**, 2357–2367.
- 18 Miller BE, Mayer RJ, Goyal N, Bal J, Dallow N, Boyce M, Carpenter D, Churchill A, Heslop T & Lazaar AL (2017) Epithelial desquamation observed in a phase I study of an oral cathepsin C inhibitor (GSK2793660). *Br J Clin Pharmacol* **83**, 2813–2820.
- 19 Palmér R, Mäenpää J, Jauhiainen A, Larsson B, Mo J, Russell M, Root J, Prothon S, Chialda L, Forte P, Egelrud T, Stenvall K & Gardiner P (2018) Dipeptidyl Peptidase 1 Inhibitor AZD7986 Induces a Sustained, Exposure-Dependent Reduction in Neutrophil Elastase Activity in Healthy Subjects. *Clin Pharmacol Ther* In press.
- 20 Klemba M, Gluzman I & Goldberg DE (2004) A *Plasmodium falciparum* dipeptidyl aminopeptidase I participates in vacuolar hemoglobin degradation. *J Biol Chem* **279**, 43000–43007.
- 21 Lehmann C, Tan MSY, de Vries LE, Russo I, Sanchez MI, Goldberg DE & Deu E (2018)

- Plasmodium falciparum* dipeptidyl aminopeptidase 3 activity is important for efficient erythrocyte invasion by the malaria parasite. *PloS Pathogens* **14**, e1007031.
- 22 Lin J-W, Spaccapelo R, Schwarzer E, Sajid M, Annoura T, Deroost K, Ravelli RBG, Aime E, Capuccini B, Mommaas-Kienhuis AM, O'Toole T, Prins F, Franke-Fayard BMD, Ramesar J, Chevalley-Maurel S, Kroeze H, Koster AJ, Tanke HJ, Crisanti A, Langhorne J, Arese P, Van den Steen PE, Janse CJ & Khan SM (2015) Replication of *Plasmodium* in reticulocytes can occur without hemozoin formation, resulting in chloroquine resistance. *J Exp Med* **212**, 893–903.
- 23 Capuccini B, Lin J, Talavera-López C, Khan SM, Sodenkamp J, Spaccapelo R & Langhorne J (2016) Transcriptomic profiling of microglia reveals signatures of cell activation and immune response, during experimental cerebral malaria. *Sci Rep* **6**, 39258.
- 24 Schwach F, Bushell E, Gomes AR, Anar B, Girling G, Herd C, Rayner JC & Billker O (2015) PlasmogEM, a database supporting a community resource for large-scale experimental genetics in malaria parasites. *Nucleic Acids Res* **43**, D1176–82.
- 25 Deu E, Leyva MJ, Albrow VE, Rice MJ, Ellman JA & Bogyo M (2010) Functional studies of *Plasmodium falciparum* dipeptidyl aminopeptidase I using small molecule inhibitors and active site probes. *Chem Bio* **17**, 808–819.
- 26 Arastu-Kapur S, Ponder EL, Fonović UP, Yeoh S, Yuan F, Fonović M, Grainger M, Phillips CI, Powers JC & Bogyo M (2008) Identification of proteases that regulate erythrocyte rupture by the malaria parasite *Plasmodium falciparum*. *Nat Chem Biol* **4**, 203–213.
- 27 Suárez-Cortés P, Sharma V, Bertuccini L, Costa G, Bannerman N-L, Sannella AR, Williamson K, Klemba M, Levashina EA, Lasonder E & Alano P (2016) Comparative Proteomics and Functional Analysis Reveal a Role of *Plasmodium falciparum* osmiophilic bodies in malaria parasite transmission. *Mol Cell Proteomics* **15**, 3243–3255.
- 28 Tanaka TQ, Deu E, Molina-Cruz A, Ashburne MJ, Ali O, Suri A, Kortagere S, Bogyo M &

- Williamson KC (2013) *Plasmodium* dipeptidyl aminopeptidases as malaria transmission-blocking drug targets. *Antimicrob Agents Chemother* **57**, 4645–4652.
- 29 Thornberry NA, Rano TA, Peterson EP, Rasper DM, Timkey T, Garcia-Calvo M, Houtzager VM, Nordstrom PA, Roy S, Vaillancourt JP, Chapman KT & Nicholson DW (1997) A combinatorial approach defines specificities of members of the caspase family and granzyme B. Functional relationships established for key mediators of apoptosis. *J Biol Chem* **272**, 17907–17911.
- 30 Rano TA, Timkey T, Peterson EP, Rotonda J, Nicholson DW, Becker JW, Chapman KT & Thornberry NA (1997) A combinatorial approach for determining protease specificities: application to interleukin-1beta converting enzyme (ICE). *Chem Biol* **4**, 149–155.
- 31 Harris JL, Backes BJ, Leonetti F, Mahrus S, Ellman JA & Craik CS (2000) Rapid and general profiling of protease specificity by using combinatorial fluorogenic substrate libraries. *Proc Natl Acad Sci USA* **97**, 7754–7759.
- 32 Drag M, Bogyo M, Ellman JA & Salvesen GS (2010) Aminopeptidase fingerprints, an integrated approach for identification of good substrates and optimal inhibitors. *J Biol Chem* **285**, 3310–3318.
- 33 Poreba M, McGowan S, Skinner-Adams TS, Trenholme KR, Gardiner DL, Whisstock JC, To J, Salvesen GS, Dalton JP & Drag M (2012) Fingerprinting the substrate specificity of M1 and M17 aminopeptidases of human malaria, *Plasmodium falciparum*. *PLoS ONE* **7**, e31938–8.
- 34 Poreba M, Mihelic M, Krai P, Rajkovic J, Krezel A, Pawelczak M, Klemba M, Turk D, Turk B, Latajka R & Drag M (2014) Unnatural amino acids increase activity and specificity of synthetic substrates for human and malarial cathepsin C. *Amino Acids* **46**, 931–943.
- 35 Nazif T & Bogyo M (2001) Global analysis of proteasomal substrate specificity using positional-scanning libraries of covalent inhibitors. *Proc Natl Acad Sci USA* **98**, 2967–

- 2972.
- 36 Greenbaum DC, Arnold WD, Lu F, Hayrapetian L, Baruch A, Krumrine J, Toba S, Chehade K, Brömme D, Kuntz ID & Bogyo M (2002) Small molecule affinity fingerprinting. A tool for enzyme family subclassification, target identification, and inhibitor design. *Chem Biol* **9**, 1085–1094.
- 37 Kasperkiewicz P, Poreba M, Snipas SJ, Parker H, Winterbourn CC, Salvesen GS & Drag M (2014) Design of ultrasensitive probes for human neutrophil elastase through hybrid combinatorial substrate library profiling. *Proc Natl Acad Sci U.S.A.* **111**, 2518–2523.
- 38 Kasperkiewicz P, Poreba M, Groborz K & Drag M (2017) Emerging challenges in the design of selective substrates, inhibitors and activity-based probes for indistinguishable proteases. *FEBS J.* **284**, 1518–1539.
- 39 Poreba M, Mihelic M, Krai P, Rajkovic J, Krezel A, Pawelczak M, Klemba M, Turk D, Turk B, Latajka R & Drag M (2014) Unnatural amino acids increase activity and specificity of synthetic substrates for human and malarial cathepsin C. *Amino Acids* **46**, 931–943.
- 40 Wang F, Krai P, Deu E, Bibb B, Lauritzen C, Pedersen J, Bogyo M & Klemba M (2011) Biochemical characterization of *Plasmodium falciparum* dipeptidyl aminopeptidase 1. *Mol Biochem Parasitol* **175**, 10–20.
- 41 Deu E, Yang Z, Wang F, Klemba M & Bogyo M (2010) Use of activity-based probes to develop high throughput screening assays that can be performed in complex cell extracts. *PLoS ONE* **5**, e11985.
- 42 Mahajan SS, Deu E, Lauterwasser EMW, Leyva MJ, Ellman JA, Bogyo M & Renslo AR (2011) A fragmenting hybrid approach for targeted delivery of multiple therapeutic agents to the malaria parasite. *ChemMedChem* **6**, 415–419.
- 43 Sanman LE & Bogyo M (2014) Activity-based profiling of proteases. *Annu Rev Biochem* **83**, 249–273.

- 44 Yuan F, Verhelst SHL, Blum G, Coussens LM & Bogyo M (2006) A selective activity-based probe for the papain family cysteine protease dipeptidyl peptidase I/cathepsin C. *J Am Chem Soc* **128**, 5616–5617.
- 45 Sijwali PS, Koo J, Singh N & Rosenthal PJ (2006) Gene disruptions demonstrate independent roles for the four falcipain cysteine proteases of *Plasmodium falciparum*. *Mol Biochem Parasitol* **150**, 96–106.
- 46 Sijwali PS, Kato K, Seydel KB, Gut J, Lehman J, Klemba M, Goldberg DE, Miller LH & Rosenthal PJ (2004) *Plasmodium falciparum* cysteine protease falcipain-1 is not essential in erythrocytic stage malaria parasites. *Proc Natl Acad Sci USA* **101**, 8721–8726.
- 47 Greenbaum DC, Baruch A, Grainger M, Bozdech Z, Medzihradzky KF, Engel J, DeRisi J, Holder AA & Bogyo M (2002) A role for the protease falcipain 1 in host cell invasion by the human malaria parasite. *Science* **298**, 2002–2006.
- 48 Berger AB, Sexton KB & Bogyo M (2006) Commonly used caspase inhibitors designed based on substrate specificity profiles lack selectivity. *Cell Res.* **16**, 961–963.
- 49 Poreba M, Groborz K, Navarro M, Snipas SJ, Drag M & Salvesen GS (2018) Caspase selective reagents for diagnosing apoptotic mechanisms. *Cell Death Differ.* **9**, 231.
- 50 Choe Y, Leonetti F, Greenbaum DC, Lecaille F, Bogyo M, Brömme D, Ellman JA & Craik CS (2006) Substrate profiling of cysteine proteases using a combinatorial peptide library identifies functionally unique specificities. *J Biol Chem* **281**, 12824–12832.
- 51 Berger AB, Witte MD, Denault J-B, Sadaghiani AM, Sexton KMB, Salvesen GS & Bogyo M (2006) Identification of early intermediates of caspase activation using selective inhibitors and activity-based probes. *Mol Cell* **23**, 509–521.
- 52 Poreba M, Kasperkiewicz P, Snipas SJ, Fasci D, Salvesen GS & Drag M (2014) Unnatural amino acids increase sensitivity and provide for the design of highly selective caspase substrates. *Cell Death Differ* **21**, 1482–1492.

- 53 Rut W, Zhang L, Kasperkiewicz P, Poreba M, Hilgenfeld R & Drag M (2017) Extended substrate specificity and first potent irreversible inhibitor/activity-based probe design for Zika virus NS2B-NS3 protease. *Antiviral Res* **139**, 88-94.
- 54 Gruba N, Rodriguez Martinez JI, Grzywa R, Wysocka M, Skoreński M, Burmistrz M, Łęcka M, Lesner A, Sieńczyk M & Pyrc K (2016) Substrate profiling of Zika virus NS2B-NS3 protease. *FEBS Letters* **590**, 3459–3468.
- 55 Deu E (2017) Proteases as antimalarial targets: strategies for genetic, chemical, and therapeutic validation. *FEBS J* **284**, 2604–2628.
- 56 Methot N, Guay D, Rubin J, Ethier D, Ortega K, Wong S, Normandin D, Beaulieu C, Reddy TJ, Riendeau D & Percival MD (2008) In vivo inhibition of serine protease processing requires a high fractional inhibition of cathepsin C. *Mol Pharmacol* **73**, 1857–1865.
- 57 Borodovsky A, Ovaa H, Kolli N, Gan-Erdene T, Wilkinson KD, Ploegh HL & Kessler BM (2002) Chemistry-based functional proteomics reveals novel members of the deubiquitinating enzyme family. *Chem Biol* **9**, 1149–1159.
- 58 Schneck JL, Villa JP, McDevitt P, McQueney MS, Thrall SH & Meek TD (2008) Chemical mechanism of a cysteine protease, cathepsin C, as revealed by integration of both steady-state and pre-steady-state solvent kinetic isotope effects. *Biochemistry* **47**, 8697–8710.
- 59 Rubach JK, Cui G, Schneck JL, Taylor AN, Zhao B, Smallwood A, Nevins N, Wisnoski D, Thrall SH & Meek TD (2012) The amino-acid substituents of dipeptide substrates of cathepsin C can determine the rate-limiting steps of catalysis. *Biochemistry* **51**, 7551–7568.
- 60 Poreba M, Szalek A, Kasperkiewicz P & Drag M (2014) Positional scanning substrate combinatorial library (PS-SCL) approach to define caspase substrate specificity. *Methods Mol Biol* **1133**, 41–59.
- 61 Yang P-Y, Wang M, He CY & Yao SQ (2012) Proteomic profiling and potential cellular target identification of K11777, a clinical cysteine protease inhibitor, in Trypanosoma

- brucei. *Chem Commun* **48**, 835–837.
- 62 Cathepsins (2018) Cathepsins. *Methods in Enzymology* **19**, 285–315.
- 63 Horn M, Baudys M, Voburka Z, Kluch I, Vondrášek J & Mareš M (2002) Free-thiol Cys331 exposed during activation process is critical for native tetramer structure of cathepsin C (dipeptidyl peptidase I). *Protein Sci* **11**, 933–943.
- 64 Morrison JF & Walsh CT (1988) The behavior and significance of slow-binding enzyme inhibitors. *Adv Enzymol Relat Areas Mol Biol* **61**, 201–301.
- 65 Collins CR, Hackett F, Strath M, Penzo M, Withers-Martinez C, Baker DA & Blackman MJ (2013) Malaria parasite cGMP-dependent protein kinase regulates blood stage merozoite secretory organelle discharge and egress. *PLoS Pathog* **9**, e1003344.



| <b>Table1.</b> Steady-state Michaelis Menten parameters for DPAP3. |    |                           |                      |                                                |
|--------------------------------------------------------------------|----|---------------------------|----------------------|------------------------------------------------|
| Substrate                                                          | N  | $k_{cat}$<br>( $s^{-1}$ ) | $K_m$<br>( $\mu M$ ) | $k_{cat}/K_m \cdot 10^{-3}$ ( $M^{-1}s^{-1}$ ) |
| Met-His-ACC                                                        | 4  | $0.23 \pm 0.02$           | $42 \pm 10$          | $5.4 \pm 1$                                    |
| Met-nVal-ACC                                                       | 4  | $0.54 \pm 0.04$           | $43 \pm 5$           | $13 \pm 1$                                     |
| Met-hPhe-ACC                                                       | 4  | $0.5 \pm 0.02$            | $20 \pm 2$           | $24 \pm 2$                                     |
| Met-Met-ACC                                                        | 4  | $0.54 \pm 0.02$           | $21 \pm 2$           | $26 \pm 1$                                     |
| Met-Lys-ACC                                                        | 4  | $1.00 \pm 0.04$           | $34 \pm 2$           | $29 \pm 1$                                     |
| Met-Bpa-ACC                                                        | 3  | $0.48 \pm 0.04$           | $14 \pm 3$           | $34 \pm 4$                                     |
| Met-hArg-ACC                                                       | 4  | $0.92 \pm 0.02$           | $27 \pm 2$           | $35 \pm 1$                                     |
| Met-Arg-ACC                                                        | 4  | $1.26 \pm 0.06$           | $31 \pm 3$           | $41 \pm 2$                                     |
| Met-Glu(Bzl)-ACC                                                   | 4  | $0.56 \pm 0.04$           | $13 \pm 2$           | $46 \pm 6$                                     |
| Met-Arg(NO <sub>2</sub> )-ACC                                      | 4  | $1.90 \pm 0.08$           | $23 \pm 2$           | $84 \pm 4$                                     |
| Met-nLeu(o-Bzl)-ACC                                                | 10 | $1.66 \pm 0.02$           | $8.8 \pm 0.4$        | $186 \pm 6$                                    |
| hPro-hPhe-ACC <sup>1</sup>                                         | 3  | $0.007 \pm 0.001$         | $26 \pm 6$           | $0.30 \pm 0.04$                                |
| Trp-hPhe-ACC                                                       | 3  | $0.017 \pm 0.002$         | $7 \pm 1$            | $2.5 \pm 0.3$                                  |
| Phe-hPhe-ACC                                                       | 3  | $0.032 \pm 0.008$         | $20 \pm 8$           | $1.6 \pm 0.2$                                  |
| Igl-hPhe-ACC                                                       | 3  | $0.044 \pm 0.004$         | $4.7 \pm 0.9$        | $9.4 \pm 1$                                    |
| hAla-hPhe-ACC                                                      | 3  | $0.0014 \pm 0.002$        | $14.7 \pm 0.8$       | $9.8 \pm 1$                                    |
| Ile-hPhe-ACC                                                       | 4  | $0.12 \pm 0.01$           | $12 \pm 3$           | $10 \pm 1$                                     |
| Phg-hPhe-ACC                                                       | 4  | $0.110 \pm 0.004$         | $10 \pm 1$           | $11 \pm 1$                                     |
| Phe(Me)-hPhe-ACC                                                   | 3  | $0.072 \pm 0.004$         | $6 \pm 1$            | $12 \pm 1$                                     |
| Tyr(NO <sub>2</sub> )-hPhe-ACC                                     | 3  | $0.134 \pm 0.002$         | $9.9 \pm 0.4$        | $13.6 \pm 0.4$                                 |
| Gln-hPhe-ACC                                                       | 3  | $0.052 \pm 0.001$         | $19 \pm 10$          | $2.7 \pm 0.9$                                  |
| Glu-hPhe-ACC                                                       | 3  | $0.024 \pm 0.002$         | $1.7 \pm 0.5$        | $13 \pm 3$                                     |
| Val-hPhe-ACC                                                       | 3  | $0.24 \pm 0.04$           | $14 \pm 4$           | $18 \pm 2$                                     |
| nLeu-hPhe-ACC                                                      | 3  | $0.28 \pm 0.02$           | $5.9 \pm 1.3$        | $46 \pm 6$                                     |
| nVal-hPhe-ACC                                                      | 4  | $0.164 \pm 0.005$         | $1.30 \pm 0.08$      | $128 \pm 6$                                    |
| Leu-hPhe-ACC                                                       | 3  | $0.100 \pm 0.002$         | $0.50 \pm 0.03$      | $210 \pm 10$                                   |
| Phg-nLeu(o-Bzl)-ACC                                                | 8  | $0.80 \pm 0.02$           | $7.8 \pm 0.8$        | $102 \pm 6$                                    |
| Leu-nLeu(o-Bzl)-ACC                                                | 5  | $0.308 \pm 0.006$         | $0.5 \pm 0.1$        | $640 \pm 100$                                  |
| nVal-nLeu(o-Bzl)-ACC                                               | 8  | $1.28 \pm 0.02$           | $1.4 \pm 0.1$        | $920 \pm 60$                                   |
| Leu-Bpa-ACC                                                        | 4  | $0.170 \pm 0.004$         | $0.61 \pm 0.06$      | $280 \pm 20$                                   |
| Phe-Arg-ACC                                                        | 4  | $0.018 \pm 0.006$         | $20 \pm 10$          | $0.9 \pm 0.2$                                  |
| Pro-Arg-AMC <sup>2</sup>                                           | 3  | $0.102 \pm 0.004$         | $88 \pm 5$           | $1.16 \pm 0.04$                                |
| Val-Arg-ACC <sup>3</sup>                                           | 3  | $1.08 \pm 0.06$           | $63 \pm 5$           | $17.0 \pm 0.4$                                 |
| Leu-Arg-ACC                                                        | 8  | $0.330 \pm 0.006$         | $1.8 \pm 0.2$        | $185 \pm 15$                                   |
| nVal-Arg-ACC                                                       | 8  | $0.346 \pm 0.004$         | $0.72 \pm 0.05$      | $480 \pm 30$                                   |
| <i>Phe-Arg-βNA</i>                                                 | 4  | $0.96 \pm 0.04$           | $51 \pm 5$           | $19 \pm 1$                                     |

N is the number of replicates.  
<sup>1</sup>For DPAP1,  $k_{cat} = 0.22 \pm 0.004 s^{-1}$ ,  $K_m = 0.67 \pm 0.14 \mu M$  and  $k_{cat}/K_m = 320,000 \pm 50,000 M^{-1}s^{-1}$ ; for CatC,  $k_{cat} = 10.8 \pm 0.2 s^{-1}$ ,  $K_m = 91 \pm 5 \mu M$  and  $k_{cat}/K_m = 116,000 \pm 11,000 M^{-1}s^{-1}$ . [34]  
<sup>2</sup>For DPAP1,  $k_{cat} = 6.2 \pm 0.4 s^{-1}$ ,  $K_m = 84 \pm 9 \mu M$  and  $k_{cat}/K_m = 74,000 \pm 2000 M^{-1}s^{-1}$ ; for CatC,  $k_{cat} = 490 \pm 10 s^{-1}$ ,  $K_m = 130 \pm 10 \mu M$  and  $k_{cat}/K_m = 3,600,000 \pm 300,000 M^{-1}s^{-1}$ . [40]  
<sup>3</sup>For DPAP1,  $k_{cat} = 3.5 \pm 0.1 s^{-1}$ ,  $K_m = 21 \pm 2 \mu M$  and  $k_{cat}/K_m = 170,000 \pm 10,000 M^{-1}s^{-1}$ ; for CatC,  $k_{cat} = 180 \pm 10 s^{-1}$ ,  $K_m = 51 \pm 8 \mu M$  and  $k_{cat}/K_m = 3,600,000 \pm 300,000 M^{-1}s^{-1}$ . [40]

**Table 2.** DPAP3, DPAP1 and CatC inhibition constants for the vinyl sulfone library.

| P2                    | DPAP3                                                  |                |                                                                            | DPAP1                                                  |                |                                                                            | CatC                                                   |                |                                                                            |
|-----------------------|--------------------------------------------------------|----------------|----------------------------------------------------------------------------|--------------------------------------------------------|----------------|----------------------------------------------------------------------------|--------------------------------------------------------|----------------|----------------------------------------------------------------------------|
|                       | $k_{\text{inact}} \cdot 10^{-3}$<br>(s <sup>-1</sup> ) | $K_i$<br>(nM)  | $k_{\text{inact}}/K_i \cdot 10^{-3}$<br>(M <sup>-1</sup> s <sup>-1</sup> ) | $k_{\text{inact}} \cdot 10^{-3}$<br>(s <sup>-1</sup> ) | $K_i$<br>(nM)  | $k_{\text{inact}}/K_i \cdot 10^{-3}$<br>(M <sup>-1</sup> s <sup>-1</sup> ) | $k_{\text{inact}} \cdot 10^{-3}$<br>(s <sup>-1</sup> ) | $K_i$<br>(nM)  | $k_{\text{inact}}/K_i \cdot 10^{-3}$<br>(M <sup>-1</sup> s <sup>-1</sup> ) |
| Gly                   | 4.2 ± 0.3                                              | 3,300 ± 750    | 1.30 ± 0.25                                                                | 3.0 ± 0.2                                              | 3,300 ± 750    | 0.9 ± 0.1                                                                  | 3.0 ± 0.2                                              | 70 ± 9         | 43 ± 4                                                                     |
| Ala                   | 2.4 ± 0.1                                              | 88 ± 13        | 27 ± 3                                                                     | 3.03 ± 0.09                                            | 90 ± 7         | 34 ± 2                                                                     | 3.00 ± 0.06                                            | 9.7 ± 0.4      | 310 ± 8                                                                    |
| Acpc                  | 3.2 ± 0.1                                              | 47,000 ± 3,000 | 0.0677 ± 0.0001                                                            | 6.2 ± 0.3                                              | 49,000 ± 4,000 | 0.127 ± 0.006                                                              | 1.03 ± 0.06                                            | 3,200 ± 700    | 0.33 ± 0.06                                                                |
| hAla                  | 2.2 ± 0.3                                              | 13.5 ± 6       | 166 ± 50                                                                   | 5.2 ± 0.7                                              | 19 ± 4         | 267 ± 26                                                                   | 2.9 ± 0.2                                              | 5.9 ± 0.9      | 500 ± 50                                                                   |
| Aib                   | N.S.                                                   | N.S.           | 0.0363 ± 0.0006                                                            | 8.9 ± 0.5                                              | 18,000 ± 2,000 | 0.49 ± 0.03                                                                | 1.20 ± 0.07                                            | 2,100 ± 300    | 0.57 ± 0.06                                                                |
| Val                   | 3.2 ± 0.2                                              | 5.7 ± 1.1      | 554 ± 84                                                                   | 3.6 ± 0.2                                              | 2.6 ± 0.4      | 1,380 ± 140                                                                | 2.9 ± 0.1                                              | 14 ± 2         | 200 ± 15                                                                   |
| Ile                   | 3.4 ± 0.4                                              | 23 ± 9         | 148 ± 45                                                                   | 3.2 ± 0.1                                              | 92 ± 8         | 34 ± 3                                                                     | 3.7 ± 0.8                                              | 1,300 ± 400    | 2.9 ± 0.3                                                                  |
| nLeu                  | 3.7 ± 0.2                                              | 31 ± 3         | 120 ± 7.5                                                                  | 4.4 ± 0.3                                              | 14 ± 2         | 305 ± 24                                                                   | 2.40 ± 0.05                                            | 7.0 ± 0.5      | 340 ± 20                                                                   |
| Cba                   | 2.5 ± 0.1                                              | 140 ± 25       | 17 ± 2.5                                                                   | 5.4 ± 0.4                                              | 13,000 ± 2,000 | 0.41 ± 0.03                                                                | 1.29 ± 0.03                                            | 2,400 ± 140    | 0.53 ± 0.02                                                                |
| Thr                   | 2.0 ± 0.1                                              | 36 ± 8         | 55 ± 10                                                                    | 4.4 ± 0.2                                              | 112 ± 10       | 39 ± 2                                                                     | 2.38 ± 0.03                                            | 65 ± 3         | 36 ± 1                                                                     |
| Asn                   | 7.4 ± 0.8                                              | 2,100 ± 1,000  | 3.5 ± 1.4                                                                  | 9.9 ± 0.5                                              | 10,500 ± 750   | 0.95 ± 0.02                                                                | 2.40 ± 0.07                                            | 260 ± 30       | 9.2 ± 0.7                                                                  |
| Gln                   | 2.9 ± 0.2                                              | 80 ± 20        | 35 ± 8                                                                     | 4.7 ± 0.2                                              | 50 ± 3         | 93 ± 3                                                                     | 2.3 ± 0.1                                              | 15 ± 3         | 160 ± 25                                                                   |
| Asp                   | 2.9 ± 0.2                                              | 1,900 ± 400    | 1.5 ± 0.2                                                                  | 5.4 ± 0.2                                              | 2,100 ± 200    | 2.6 ± 0.10                                                                 | 3.0 ± 0.1                                              | 2,200 ± 200    | 1.4 ± 0.2                                                                  |
| Glu                   | 2.7 ± 0.1                                              | 51 ± 8         | 53 ± 6                                                                     | 5.0 ± 0.4                                              | 650 ± 100      | 7.6 ± 0.75                                                                 | 2.6 ± 0.1                                              | 140 ± 20       | 18 ± 2                                                                     |
| His                   | 3.7 ± 0.3                                              | 100 ± 25       | 35.5 ± 7.5                                                                 | 4.3 ± 0.3                                              | 150 ± 20       | 29 ± 3                                                                     | 2.1 ± 0.1                                              | 0.6 ± 0.1      | 3,350 ± 500                                                                |
| Lys                   | N.S.                                                   | N.S.           | 0.020 ± 0.001                                                              | N.S.                                                   | N.S.           | 0.081 ± 0.004                                                              | 1.49 ± 0.05                                            | 3,600 ± 200    | 0.42 ± 0.02                                                                |
| Arg                   | N.S.                                                   | N.S.           | 0.065 ± 0.006                                                              | N.S.                                                   | N.S.           | 0.084 ± 0.002                                                              | 4.0 ± 0.5                                              | 11,000 ± 2,000 | 0.38 ± 0.02                                                                |
| Phg                   | N.S.                                                   | N.S.           | 0.0357 ± 0.0007                                                            | 8.3 ± 0.5                                              | 7,000 ± 650    | 1.19 ± 0.05                                                                | 2.5 ± 0.2                                              | 86 ± 20        | 29 ± 5                                                                     |
| 2fa                   | 3.8 ± 0.3                                              | 39 ± 10        | 97 ± 18                                                                    | 5.2 ± 0.4                                              | 11 ± 3         | 470 ± 90                                                                   | 3.7 ± 0.2                                              | 2.1 ± 0.2      | 1,720 ± 90                                                                 |
| 2ta                   | 3.4 ± 0.3                                              | 29 ± 7         | 118 ± 23                                                                   | 3.8 ± 0.3                                              | 82 ± 20        | 47 ± 7                                                                     | 3.3 ± 0.3                                              | 6.5 ± 1        | 510 ± 55                                                                   |
| Cha                   | 2.7 ± 0.1                                              | 90 ± 20        | 31.6 ± 5.5                                                                 | N.S.                                                   | N.S.           | 0.020 ± 0.001                                                              | 2.3 ± 0.1                                              | 300 ± 40       | 7.7 ± 0.8                                                                  |
| Phe                   | 2.6 ± 0.2                                              | 45 ± 13        | 60 ± 15                                                                    | N.S.                                                   | N.S.           | 0.40 ± 0.01                                                                | 2.18 ± 0.08                                            | 1.4 ± 0.2      | 1,600 ± 200                                                                |
| Phe(Me)               | 5.4 ± 0.4                                              | 9,200 ± 300    | 0.580 ± 0.025                                                              | N.S.                                                   | N.S.           | 0.314 ± 0.005                                                              | 2.8 ± 0.2                                              | 1,300 ± 200    | 2.2 ± 0.3                                                                  |
| Phe(I)                | 3.8 ± 0.3                                              | 110 ± 30       | 36 ± 10                                                                    | 7.0 ± 0.3                                              | 47,000 ± 3,500 | 0.151 ± 0.006                                                              | 1.02 ± 0.06                                            | 185 ± 40       | 5.5 ± 0.9                                                                  |
| Phe(NH2)              | 3.1 ± 0.2                                              | 39 ± 7         | 80 ± 12                                                                    | 5.0 ± 0.4                                              | 22,000 ± 2500  | 0.23 ± 0.01                                                                | 1.01 ± 0.02                                            | 5.3 ± 0.3      | 191 ± 9                                                                    |
| Tyr                   | 2.18 ± 0.07                                            | 12.7 ± 1.5     | 172 ± 16                                                                   | N.S.                                                   | N.S.           | 0.310 ± 0.005                                                              | 2.10 ± 0.06                                            | 11.5 ± 0.9     | 182 ± 10                                                                   |
| Tyr(NO <sub>2</sub> ) | 7.2 ± 0.9                                              | 250 ± 40       | 28.8 ± 0.8                                                                 | N.S.                                                   | N.S.           | 0.023 ± 0.002                                                              | N.S.                                                   | N.S.           | 0.147 ± 0.008                                                              |
| hPhe                  | 2.36 ± 0.08                                            | 310 ± 30       | 7.6 ± 0.7                                                                  | N.S.                                                   | N.S.           | 0.029 ± 0.002                                                              | N.S.                                                   | N.S.           | 0.103 ± 0.005                                                              |
| Trp                   | 2.5 ± 0.1                                              | 30 ± 6         | 84 ± 14                                                                    | N.S.                                                   | N.S.           | 0.074 ± 0.002                                                              | 1.98 ± 0.03                                            | 61 ± 4         | 32 ± 2                                                                     |
| Igl                   | 2.2 ± 0.1                                              | 29 ± 5         | 78 ± 12                                                                    | N.S.                                                   | N.S.           | 0.313 ± 0.007                                                              | 2.3 ± 0.1                                              | 240 ± 40       | 10 ± 1                                                                     |
| 2Nal                  | 3.7 ± 0.3                                              | 7,100 ± 1,000  | 0.510 ± 0.04                                                               | 5.3 ± 1.3                                              | 15,200 ± 6,500 | 0.35 ± 0.07                                                                | 2.6 ± 0.2                                              | 1,800 ± 400    | 1.5 ± 0.2                                                                  |
| Bip                   | N.S.                                                   | N.S.           | 0.0314 ± 0.0004                                                            | N.S.                                                   | N.S.           | 0.0178 ± 0.0004                                                            | 2.53 ± 0.09                                            | 6,200 ± 800    | 0.41 ± 0.04                                                                |
| Inp                   | 5.2 ± 0.4                                              | 65,000 ± 800   | 0.079 ± 0.004                                                              | N.S.                                                   | N.S.           | 0.03 ± 0.001                                                               | 1.05 ± 0.06                                            | 5,600 ± 900    | 0.19 ± 0.02                                                                |
| Amc                   | 5.7 ± 0.3                                              | 75,000 ± 7,000 | 0.076 ± 0.003                                                              | 5.8 ± 0.3                                              | 27,000 ± 2500  | 0.213 ± 0.009                                                              | 0.97 ± 0.04                                            | 1000 ± 200     | 0.94 ± 0.17                                                                |
| 3Abz                  | 3.4 ± 0.4                                              | 3,100 ± 600    | 1.1 ± 0.1                                                                  | 4.8 ± 0.3                                              | 3000 ± 500     | 1.6 ± 0.2                                                                  | 1.08 ± 0.07                                            | 55 ± 12        | 20 ± 4                                                                     |
| Amb                   | N/A                                                    | 3,200 ± 1000   | N/A                                                                        | N.S.                                                   | N.S.           | 0.140 ± 0.007                                                              | 1.6 ± 0.1                                              | 2100 ± 300     | 0.74 ± 0.06                                                                |

N.S. No saturation, only  $k_{\text{inact}}/K_i$  could be obtained. N/A, no time dependent inactivation was observed, data consistent with reversible inhibition.

**Table 3.** Inhibition constants for optimal vinyl sulfone inhibitors

| Inhibitor Name                       | DPAP3                                                  |               |                                                                            | DPAP1                                                  |                  |                                                                            | CatC                                                   |                 |                                                                            | Specificity Ratio <sup>a</sup> |                |                |
|--------------------------------------|--------------------------------------------------------|---------------|----------------------------------------------------------------------------|--------------------------------------------------------|------------------|----------------------------------------------------------------------------|--------------------------------------------------------|-----------------|----------------------------------------------------------------------------|--------------------------------|----------------|----------------|
|                                      | $k_{\text{inact}} \cdot 10^{-3}$<br>(s <sup>-1</sup> ) | $K_i$<br>(nM) | $k_{\text{inact}}/K_i \cdot 10^{-3}$<br>(M <sup>-1</sup> s <sup>-1</sup> ) | $k_{\text{inact}} \cdot 10^{-3}$<br>(s <sup>-1</sup> ) | $K_i$<br>(nM)    | $k_{\text{inact}}/K_i \cdot 10^{-3}$<br>(M <sup>-1</sup> s <sup>-1</sup> ) | $k_{\text{inact}} \cdot 10^{-3}$<br>(s <sup>-1</sup> ) | $K_i$<br>(nM)   | $k_{\text{inact}}/K_i \cdot 10^{-3}$<br>(M <sup>-1</sup> s <sup>-1</sup> ) | DPAP1/<br>DPAP3                | DPAP1/<br>CatC | DPAP3/<br>CatC |
| Pro-hPhe-VS                          | 3.5 ± 0.2                                              | 860 ± 100     | 4.1 ± 0.3                                                                  | 2.1 ± 0.2                                              | 4.6 ± 0.7        | 470 ± 35                                                                   | 1.45 ± 0.07                                            | 34 ± 5          | 42 ± 5                                                                     | <b>115</b>                     | 11             | 0.10           |
| hPro-hPhe-VS                         | 2.1 ± 0.1                                              | 30 ± 7        | 69 ± 13                                                                    | 4.8 ± 0.6                                              | 3.9 ± 1.5        | 1,230 ± 400                                                                | 1.67 ± 0.08                                            | 22 ± 3          | 76 ± 0.8                                                                   | 18                             | 16             | 0.91           |
| hPro-nLeu(o-Bzl)-VS                  | 2.0 ± 0.1                                              | 39 ± 6        | 53 ± 6.5                                                                   | 2.9 ± 0.3                                              | 0.8 ± 0.2        | 3,560 ± 150                                                                | 1.67 ± 0.03                                            | 11.2 ± 0.6      | 150 ± 6                                                                    | 68                             | 24             | 0.35           |
| Tyr(NO <sub>2</sub> )-hPhe-VS        | 2.26 ± 0.05                                            | 2.4 ± 0.2     | 950 ± 74                                                                   | 3.8 ± 1                                                | 25,000 ± 1,400   | 0.15 ± 0.05                                                                | 3.2 ± 0.6                                              | 58,000 ± 20,000 | 0.054 ± 0.008                                                              | <b>0.0016</b>                  | 2.8            | <b>17,600</b>  |
| Tyr(NO <sub>2</sub> )-nLeu(o-Bzl)-VS | 2.7 ± 0.2                                              | 53 ± 10       | 51 ± 10                                                                    | 2.6 ± 0.3                                              | 2,400 ± 900      | 1.1 ± 0.3                                                                  | 2.9 ± 0.2                                              | 7,700 ± 1,400   | 0.38 ± 0.05                                                                | 0.032                          | 2.9            | 89             |
| 2Nal-hPhe-VS                         | 2.59 ± 0.07                                            | 254 ± 16      | 10.2 ± 0.5                                                                 | 6.7 ± 0.2                                              | 33,000 ± 2,000   | 0.2 ± 0.005                                                                | 3.7 ± 0.2                                              | 4,000 ± 700     | 0.9 ± 0.1                                                                  | 0.02                           | 0.22           | 11             |
| 2Nal-nLeu(o-Bzl)-VS                  | 6.0 ± 0.7                                              | 2,800 ± 600   | 2.2 ± 0.3                                                                  | 5.0 ± 1.7                                              | 27,000 ± 16,000  | 0.19 ± 0.05                                                                | 2.4 ± 0.6                                              | 1,740 ± 140     | 1.37 ± 0.09                                                                | 0.14                           | 0.14           | 1.0            |
| Igl-hPhe-VS                          | 2.1 ± 0.7                                              | 10 ± 1        | 205 ± 22                                                                   | 2.7 ± 0.1                                              | 5,400 ± 500      | 0.50 ± 0.03                                                                | 5.8 ± 0.3                                              | 320 ± 70        | 18 ± 3                                                                     | <b>0.0024</b>                  | 0.028          | 11.4           |
| Igl-nLeu(o-Bzl)-VS                   | 5.6 ± 0.4                                              | 160 ± 30      | 35 ± 4.5                                                                   | 4.1 ± 0.2                                              | 4,800 ± 500      | 0.86 ± 0.05                                                                | 1.48 ± 0.06                                            | 11 ± 2          | 135 ± 14                                                                   | 0.037                          | <b>0.0064</b>  | 0.17           |
| L-Trp-hPG-VS                         | 3 ± 1                                                  | 330 ± 150     | 9.1 ± 1.5                                                                  | 2.1 ± 0.2                                              | 2,800 ± 450      | 0.74 ± 0.07                                                                | 1.73 ± 0.03                                            | 28 ± 2          | 61 ± 4                                                                     | 0.12                           | 0.012          | 0.10           |
| L-Trp-hPhe-VS                        | 3.3 ± 0.4                                              | 65 ± 15       | 52 ± 7                                                                     | 1.7 ± 0.1                                              | 540 ± 80         | 3.20 ± 0.3                                                                 | 2.2 ± 0.09                                             | 16 ± 3          | 131 ± 15                                                                   | 0.094                          | 0.024          | 0.26           |
| L-Trp-nLeu(o-Bzl)-VS                 | 3.2 ± 0.3                                              | 4 ± 1         | 826 ± 193                                                                  | 2.2 ± 0.1                                              | 380 ± 60         | 5.8 ± 0.6                                                                  | 1.74 ± 0.03                                            | 4.9 ± 0.3       | 355 ± 18                                                                   | <b>0.0070</b>                  | 0.016          | 2.3            |
| D-Trp-hPhe-VS                        | 1.7 ± 0.6                                              | 5,500 ± 3,000 | 0.32 ± 0.08                                                                | 2.7 ± 0.2                                              | 105,000 ± 10,000 | 0.026 ± 0.001                                                              | 2.6 ± 0.1                                              | 4,200 ± 600     | 0.62 ± 0.07                                                                | 0.12                           | 0.042          | 0.34           |
| D-Trp-nLeu(o-Bzl)-VS                 | 3.6 ± 0.2                                              | 7,600 ± 600   | 0.47 ± 0.01                                                                | 5.5 ± 0.7                                              | 127,000 ± 20,000 | 0.044 ± 0.002                                                              | 1.97 ± 0.06                                            | 1,100 ± 100     | 1.7 ± 0.1                                                                  | 0.094                          | 0.026          | 0.28           |
| nVal-hPhe-VS                         | 2.6 ± 0.4                                              | 2.8 ± 0.9     | 940 ± 160                                                                  | 2.0 ± 0.1                                              | 0.6 ± 0.2        | 3,160 ± 750                                                                | 2.2 ± 0.1                                              | 0.38 ± 0.08     | 5,830 ± 970                                                                | 3.36                           | 0.54           | 0.16           |

<sup>a</sup>Specificity ratio was calculated based on  $k_{\text{inact}}/K_i$  values; numbers highlighted in bold indicate more than 100-fold selectivity for the indicated enzymes.

**Table 4.** Cysteine proteases IC<sub>50</sub> values in live parasites.

| Inhibitor                            | IC <sub>50,DPAP3</sub> (nM) | IC <sub>50,DPAP1</sub> (nM) | IC <sub>50,FP1</sub> (nM) | IC <sub>50,FP2/3</sub> (nM) |
|--------------------------------------|-----------------------------|-----------------------------|---------------------------|-----------------------------|
| hPro-hPhe-VS                         | 160 ± 50                    | 80 ± 7                      | 350 ± 80                  | 3,300 ± 1,000               |
| Pro-hPhe-VS                          | > 10,000                    | 275 ± 25                    | ~ 10,000                  | > 10,000                    |
| hPro-nLeu(o-Bzl)-VS                  | 900 ± 100                   | 62 ± 7                      | 300 ± 100                 | 1,900 ± 500                 |
| Tyr(NO <sub>2</sub> )-hPhe-VS        | 190 ± 20                    | > 10,000                    | > 10,000                  | > 10,000                    |
| Tyr(NO <sub>2</sub> )-nLeu(o-Bzl)-VS | 730 ± 170                   | > 10,000                    | > 10,000                  | > 10,000                    |
| L-Trp-hPG-VS                         | 1.4 ± 0.4                   | > 10,000                    | > 10,000                  | > 10,000                    |
| L-Trp-hPhe-VS                        | 130 ± 60                    | > 10,000                    | > 10,000                  | > 10,000                    |
| L-Trp-nLeu(o-Bzl)-VS                 | 760 ± 150                   | ~ 10,000                    | ~ 10,000                  | ~ 10,000                    |
| D-Trp-hPhe-VS                        | 6,800 ± 1,600               | > 10,000                    | > 10,000                  | > 10,000                    |
| D-Trp-nLeu(o-Bzl)-VS                 | 2,700 ± 1,600               | > 10,000                    | > 10,000                  | > 10,000                    |
